1 **Out of the blue; Phototropins of the leaf vascular bundle sheath**  
2 **mediate the blue light regulation of the leaf hydraulic conductance**

3

4 **Yael Grunwald \* Sanbon Chaka Gosa\* Tanmayee Torne Nava Moran Menachem**  
5 **Moshelion#**

6 The Robert H. Smith Institute of Plant Sciences and Genetics in Agriculture, The Robert H. Smith Faculty of  
7 Agriculture, Food and Environment, The Hebrew University of Jerusalem, Rehovot 76100, Israel

8 \*Both authors contributed equally to this work

9 #Correspondence: menachem.moshelion@mail.huji.ac.il (M. Moshelion)

10

11 **ABSTRACT**

12 The leaf vascular bundle sheath cells (BSCs), which tightly envelop the leaf veins,  
13 constitute a selective dynamic barrier to water and solutes radially entering the mesophyll  
14 and play a major role in regulating the leaf radial hydraulic conductance ( $K_{leaf}$ ). Recently,  
15 we showed that the BSCs' plasma membrane  $H^+$ -ATPase, *AHA2*, increases  $K_{leaf}$  by  
16 acidifying the xylem sap. Since BL reportedly increases  $K_{leaf}$  and we found the blue light  
17 (BL) receptor genes, *PHOT1* and *PHOT2* expressed in the Arabidopsis BSCs, we  
18 hypothesized that, similar to the guard cells (GCs) BL signal transduction pathway, the  
19 BSCs' *PHOT1* and *PHOT2* activate the BSCs'  $H^+$ -ATPase and thus regulate  $K_{leaf}$ . Indeed,  
20 under BL illumination, the  $K_{leaf}$  in the knockout mutant lines *phot1-5*, *phot2-1*, *phot1-*  
21 *5phot2-1* and *aha2-4* was lower than in WT. BSCs-directed complementation (using the  
22 SCR promoter) of *phot1-5* and *aha2-4* respectively by *PHOT1* and *AHA2*, restored the  
23 BL-induced  $K_{leaf}$  increase. BSCs-specific silencing of *PHOT1* or *PHOT2* (using the SCR  
24 promoter) abolished the BL-induced  $K_{leaf}$  increase. Xylem-fed PHOT inhibitor, tyrphostin  
25 9, also abolished the BL-induced  $K_{leaf}$  increase in WT. Moreover, in WT plants, white  
26 light (WL) acidified the xylem sap compared to dark, but did not acidify the xylem sap of  
27 the *phot1-5* mutant. BSCs-specific complementation of *phot1-5* by SCR: *PHOT1*,  
28 restored the WL-induced xylem acidification. On a cellular level, BL hyperpolarized the  
29 BSCs, which was prevented by tyrphostin 9. In addition, the osmotic water permeability  
30 coefficient ( $P_f$ ) of the BSCs was higher under WL treatment. Our results link the blue  
31 light control of water fluxes from the xylem to the mesophyll via the BSCs in the  
32 following model:

33 BL →BSCs' *PHOTs* activation →tyrosine phosphorylation→BSCs' H<sup>+</sup> ATPase  
34 activation →BSCs hyperpolarization, xylem acidification →P<sub>f</sub> elevation → K<sub>leaf</sub> increase.  
35 Thus, this study is the first to demonstrate an independent BL signal transduction pathway  
36 regulation of the vascular tissue.

37

38

## 39 INTRODUCTION

40 Light, the energy source for photosynthesis, has also evolved as a signal that regulates  
41 growth and development (Kronenberg and Kendrick, 1986; Briggs and Huala, 1999) as well  
42 as physiological traits such as stomatal conductance (g<sub>s</sub>) (Hsiao et al., 1973; Zeiger and  
43 Helper, 1977; Karlsson, 1986; Kinoshita et al., 2001; Talbott et al., 2003; Van Ieperen et  
44 al., 2012) and leaf hydraulic conductance (K<sub>leaf</sub>) (Voicu et al., 2008; Ben Baaziz et al., 2012;  
45 Aasamaa and Söber, 2012; Prado and Maurel, 2013). One of the most conserved and well-  
46 studied light-sensing mechanisms is that of the blue light (BL, 390-550 nm)-which invokes  
47 stomatal opening (Grondin et al., 2015). In this signal transduction pathway, BL is  
48 perceived by the guard cells (GCs) light-activated protein kinases PHOT1 and PHOT2  
49 (Briggs and Christie, 2002; Kinoshita et al., 2001), eventually activating the plasma  
50 membrane H<sup>+</sup>-ATPases (Kinoshita and Shimazaki, 1999; Svannelid et al., 1999), which, in  
51 turn, hyperpolarizes the GCs and acidifies their surrounding apoplast (Ueno et al., 2005;  
52 Den Os et al., 2007; Elmore and Coaker, 2011; Kinoshita and Shimazaki, 1999), recently  
53 reviewed by Inoue & Kinoshita (2017). Consequently, the hyperpolarization-activated  
54 inward-rectifying K<sup>+</sup> channels (K<sub>in</sub>) are gated open enabling potassium ions (K<sup>+</sup>) influx  
55 driven by K<sup>+</sup> electrochemical potential difference. Inward K<sup>+</sup> fluxes result in an osmolyte  
56 accumulation reducing the water potential inside the cell, which, in turn, drives an influx of  
57 water leading to GCs swelling and stomatal opening (Assmann, 1993; Roelfsema and  
58 Hedrich, 2005; Shimazaki et al., 2007; Oishi et al., 2010; Yamauchi et al., 2016).

59 Conversely, at night, in the dark, the guard cells' H<sup>+</sup>-ATPases are deactivated, they are  
60 depolarized and their apoplast is alkalized (Kinoshita et al., 2001; Kinoshita and Shimazaki,  
61 1999).

62 Blue light or white light (WL) illumination has also been shown to increase the hydraulic  
63 conductance ( $K_{\text{leaf}}$ ) of the entire leaf in several plant species (Voicu et al., 2008 (bur oak);  
64 Voicu et al., 2009; Sellin et al., 2011 (silver birch); Aasamaa and Sber, 2012 (deciduous  
65 trees); Ben Baaziz et al., 2012 (walnut)). Interestingly,  $K_{\text{leaf}}$  has shown a faster response to  
66 light than  $g_s$  (Guyot et al., 2012). However, the molecular mechanism of  $K_{\text{leaf}}$  induction by  
67 light is not yet fully understood.

68 In the past decade, it has been established that the bundle sheath cells (BSCs), a  
69 parenchymatous layer which tightly enwraps the entire leaf vasculature, can act as a  
70 dynamic and selective xylem-mesophyll barrier to water and ions, which participates in  
71  $K_{\text{leaf}}$  regulation (Shapira et al., 2009; Shatil-Cohen and Moshelion, 2012; Sade et al., 2014;  
72 Wigoda et al., 2014, 2017; Grunwald et al., 2020). Moreover, we recently discovered that  
73 the BSCs' H<sup>+</sup>-ATPase proton pump, AHA2, participated in regulating  $K_{\text{leaf}}$ , via changes in  
74 the xylem pH and the positive correlation between AHA2-driven xylem acidification and  
75  $K_{\text{leaf}}$  was due to an increase in the osmotic water permeability of the BSCs membrane  
76 (Grunwald et al., 2020). AHA2 was reported (Wigoda et al., 2017 GEO repository  
77 Experiment GSE85463) to have an over-three-fold higher expression level in the BSCs than  
78 in the neighboring mesophyll cells, explaining how such acidification is possible. In  
79 addition, the same BSC transcriptome analysis (ibid.) revealed that the BL receptors  
80 PHOT1 and PHOT2 were substantially expressed in the BSCs, as well as their immediate  
81 phosphorylation substrate, BLUS1 (Blue Light Signaling1, At4g14480; (Takemiya et al.,  
82 2013)) and the BLUS1-interacting kinase, BHP (Blue-light-dependent H<sup>+</sup>-ATPase  
83 Phosphorylation, At4g18950), elements of early BL signaling in the guard cells (reviewed

84 by Inoue and Kinoshita, 2017). These findings led us to hypothesize that a BL signal  
85 transduction pathway similar to that active in opening stomata is active also in the vascular  
86 BSCs and that it has a role in the regulation of  $K_{leaf}$ .

87 In confirmation of this hypothesis, we describe here a few of the physiological and  
88 molecular details of the mechanism underlying the blue light-dependent  $K_{leaf}$  regulation by  
89 BSCs.

## 90 MATERIALS AND METHODS

### 91 Plant material

92 **Plant types.** We used WT (wild type) *Arabidopsis thaliana* plants ecotype Colombia, Col-  
93 0 (aka Col), the T-DNA insertion *AHA2* mutants *aha2-4* (SALK\_082786) (Col) and *aha2-*  
94 *4* complemented with *SCR: AHA2* (line 56) (Col), and *SCR:GFP* (Col) as described in  
95 (Grunwald et al., 2020). In addition, we used WT *Arabidopsis* (Col) with the Glabrous  
96 mutation (WT Col-gl), *phot1-5 (nph1-5)* (Col-gl), *phot 2-1(npl1-1 or cav1-1)* (Col-gl) and  
97 the double mutant *phot1-5phot2-1 (nph1-5 npl1-1)* (Col-gl) (Kagawa et al., 2001), which  
98 were kindly provided by the Ken-Ichiro Shimazaki lab (Tokyo, Japan, ).

99 **Construction of transgenic plant lines. SCR:mirPHOT Plants:** The premiR-PHOT1or  
100 PHOT2 and synthetic genes were synthesized by Hylabs (Rehovot, Israel), based on a  
101 premiR164 backbone (Alvarez et al., 2006). We used the Web-based MicroRNA Designer  
102 (WMD, <http://wmd3.weigelworld.org>) to produce a premiRNA gene MIR319a as  
103 described in WMD. After sequence verification, the premiR-PHOT1or premiR-PHOT2  
104 were cloned into the pDONR™ 221 and the SCR promoter into pDONRP4P1r (Invitrogen)  
105 vectors which are Gateway® compatible by BP reactions, and later cloned into the  
106 pB7M24GW (Invitrogen) two fragment binary vector by LR reaction according to the  
107 manufacturer's instructions. Each binary vector was transformed into *Agrobacterium* by  
108 electroporation and transformed to WT Col0 using the floral dip method (Clough and Bent,

109 1998). Transformants were selected based on their BASTA (Glufosinate Ammonium,  
110 Sigma cat # 45520) resistance, grown on plates with MS (Murashige and Skoog, Duchefa  
111 cat# M222.0050) Basal medium + 1 % sucrose and 20  $\mu\text{g/ml}$  BASTA. DNA insertion was  
112 verified in selected lines by PCR targeting the junction of the premiR-gene and the 35S  
113 terminator with the forward primer located about 1000bp from the 3' end of premiR-gene  
114 and reverse primer on the 35S terminator (see primer list in supplemental Table S1), PCR  
115 fragments were then sequenced and verified.

116 ***SCR: PHOT1 plants.*** Binary vectors were constructed with the *PHOT1* gene as described  
117 above and then transformed into *phot1-5* (Col-gl1) plants, and successful transformation  
118 was verified by PCR.

119 ***Plant Growth Conditions.*** Plants were grown in soil (Klasmann686  
120 Klasmann-Deilmann, Germany) + 4g/l Osmocote® 6M in a growth chamber at 22 °C and  
121 70% relative humidity, and 8-h light/16-h dark photoperiod. During the day, the  
122 illumination, humidity and VPD changed in a pattern resembling natural conditions, as in  
123 (Negin and Moshelion, 2017). The illumination intensity provided by LED lights strips  
124 (EnerLED 24 V-5630, 24 W/m, 3000 K (50%)/6000 K (50%)) reached up to 150-200  $\mu\text{mol}$   
125  $\text{m}^{-2} \text{sec}^{-1}$  light at the plant level. The plants were irrigated twice a week.

126 ***Detached leaves preparation for gas exchange measurements.*** Fully expanded leaves  
127 from 7-8- week-old plants were excised at the petiole base using a wet sharp blade under a  
128 drop of water. Petioles were immediately submerged in 0.5 ml Eppendorf tubes with  
129 artificial xylem solution (AXS; 3 mM  $\text{KNO}_3$ , 1 mM  $\text{Ca}(\text{NO}_3)_2$ , 1 mM  $\text{MgSO}_4$ , 3 mM  $\text{CaCl}_2$ ,  
130 0.25 mM  $\text{NaH}_2\text{PO}_4$ , 90  $\mu\text{M}$  EDFS (Sigma). The leaves were excised, shortly before “lights  
131 OFF” transition (around 5:00 PM) on the evening preceding the measurements and placed  
132 in gas-sealed transparent 25 cm x 20 cm x 15 cm plastic boxes with water-soaked tissue  
133 paper on the bottom to provide ~90% humidity. The transparent boxes were then inserted

134 into a larger light-proof plastic box overnight and kept in total darkness until the start of  
135 light treatments in the next morning.

### 136 **Light treatments of detached leaves**

137 All gas exchange experiments were conducted in a dark room ( $<1 \text{ } \mu\text{mol m}^{-2} \text{ s}^{-1}$ ) at a constant  
138 temperature of  $22 \text{ } ^\circ\text{C}$ , in the morning between 10:00 AM and 1:00 PM. The excised leaves  
139 were taken out of the light-sealed box, and placed in one of two custom-made light  
140 chambers (either red light (RL) or combined red and blue light (RL+BL), as specified  
141 further down). Leaves were exposed to either RL or RL+BL for 15 minutes in ambient  
142 vapor pressure deficit (VPD) of 1.3-1.5. A fan circulated the air in each light chamber for  
143 uniform and constant temperature and VPD. Next, leaves were transferred to a Li-cor  
144 6400XT for an additional 2-3 minutes, under the same illumination conditions with VPD  
145 of about 1.3, until stabilization of the gas exchange measurements, after which the  
146 measurement was recorded. The total illumination intensity in both light chambers was set  
147 to roughly  $220 \text{ } \mu\text{mol m}^{-2} \text{ s}^{-1}$ . In the RL chamber the leaves were illuminated only with red  
148 light (660 nm) and in the 'RL+BL' chamber they were illuminated with approximately 90%  
149 red light and 10% blue light (450 nm). D-LED lighting with adjustable current source (DR-  
150 SD6/12) was used as light sources (<http://www.d-led.net/>). Light intensity was verified  
151 daily using a LI-250A light meter with a LI-190SA quantum sensor (LI-COR, Lincoln, NE,  
152 USA).

### 153 **Determination of gas exchange, $E$ , $g_s$ , and hydraulic conductance, $K_{\text{leaf}}$**

154 Immediately after the light treatments, the leaves were placed in a LI-COR 6400XT for  
155 measurements of  $g_s$  (stomatal conductance) and  $E$  (transpiration) similar to Grunwald et  
156 al., 2020, with the following changes: all the experiments were conducted in the dark room  
157 at  $22 \text{ } ^\circ\text{C}$  and the illumination in the LI-COR cuvette was adjusted to match the preceding

158 light treatments. Immediately thereafter, the water potential ( $\Psi_{\text{leaf}}$ ) was determined in a  
159 pressure chamber (ARIMAD-3000; MRC Israel) and  $K_{\text{leaf}}$  was calculated (as in Grunwald  
160 et al., 2020). *Eq. 1:*  $K_{\text{leaf}} = -E / (\Psi_{\text{leaf}} - \Psi_{\text{AXS}}) \approx -E / \Psi_{\text{leaf}}$ ,

161 Additionally,  $g_s$  was measured at the same time as above using LI-COR 6400XT on intact  
162 leaves of whole plants left under the growth-room illumination for 2-4 hours after Lights  
163 ON. Illumination settings in the instrument's cuvette were set to the same conditions as in  
164 the growth room.

### 165 **Inhibition of light transduction in detached leaves**

166 Tyrphostin 9 (ENZO, cat. # BML-EI21, 100 mM in DMSO (Sigma, cat # W387520), kept  
167 in aliquots at -18 °C), was added to the AXS to a final concentration of 10  $\mu\text{M}$ . AXS with  
168 DMSO at a concentration of 100  $\mu\text{l/l}$  (vol/vol) served as a control in this set of experiments.  
169 Excised leaves were kept overnight until the measurements as described above. For surface  
170 application, 0.05% of Tween 20 (J.T. Baker cat# X251-07) was added to the Tyrphostin 9  
171 and control solutions and sprayed prior to overnight perfusion with unmodified AXS.  
172 Boxes holding the sprayed leaves did not contain the damp tissue paper, and leaves were  
173 patted dry prior to placing them in the light chamber to ensure the leaf surface is dry when  
174 placed in LI-COR 6400xt cuvette.

### 175 **Determination of xylem sap pH in detached leaves**

176 *Leaf preparation for imaging.* On the eve of the experiment, leaves from 6-7 week old  
177 plants, approximately 2.5 cm long and 1 cm wide, were excised with a sharp blade and  
178 perfused (as described) with AXS containing 100  $\mu\text{M}$  of the dual-excitation fluorescent pH  
179 probe, FITC-D (fluorescein isothiocyanate conjugated to 10 kD dextran, (Sigma cat. #:   
180 FD10S), added from a 10 mM stock in DDW). The excised leaves were then placed in the

181 “double box” setup (i.e. sealed plastic box inside a dark box) and kept in the dark until  
182 measurements the next morning.

183 *Dark-treated leaves:* Leaves were taken out of the dark boxes and immediately prepared  
184 for vein imaging on a microscope slide under low light conditions ( $<5 \mu\text{mol m}^{-2} \text{sec}^{-1}$ ).

185 *Light-treated leaves:* Leaves were taken out of the dark boxes and placed in the growth  
186 chamber inside transparent gas sealed boxes (boxes as in  $K_{\text{leaf}}$ ) for 30 minutes of growth  
187 room white light illumination (see above under “Plant growth conditions”) and were  
188 subsequently imaged.

189 The leaves were imaged using an inverted microscope (Olympus-IX8, as detailed by  
190 Grunwald et al., 2020). Image capture and image analysis of the intra-xylem pH were as  
191 already described (ibid.).

## 192 **Determination of the BSCs membrane potential**

193 *BSCs protoplasts imaging.* For the evaluation of protoplast membrane potential, we used a  
194 fluorescent membrane-potential-sensitive dual-excitation ratiometric dye Di-8-ANEPPS  
195 (Pucihar et al., 2009) and an inverted epifluorescence microscope (Eclipse Ti-S, Nikon,  
196 Tokyo, Japan) coupled to an IXON Ultra 888 camera (Andor, UK). BSC protoplasts  
197 isolated (Shatil-Cohen et al., 2014) from 6-8 weeks old SCR:GFP (Col) plants were kept at  
198 room temperature in the dark. A sample with a few protoplasts was placed in a bath solution  
199 in an experimental chamber, containing  $30 \mu\text{M}$  di-8-ANEPPS and 1% pluronic acid,  
200 without or with  $10 \mu\text{M}$  tyrphostin 9 (see Solutions below), and allowed to settle for 10 min  
201 on a glass coverslip bottom. A Nikon 40X objective (Plan Fluor 40x/ 0.75, OFN25 DIC  
202 M/N2) was used for protoplast viewing and imaging. An individual, perfectly round BSC  
203 ( $25\text{-}32.5 \mu\text{M}$  diameter) was selected for further imaging based on its GFP fluorescence  
204 (excitation of 490/15 nm was delivered by a xenon lamp monochromator, Polychrome II



205 (Till Photonics, Munich, Germany), under the control of IW6.1 (Imaging Workbench 6.1)  
206 software (Indec Biosystems, Santa Clara, CA), and the emitted fluorescence was filtered  
207 via a 515 nm dichroic mirror and a 525/50 nm band-pass barrier filter).

208 *Protoplasts light treatment and imaging.* The selected BSC protoplast in the experimental  
209 chamber was then darkened for 10-20 min (Control), and a first pair of images of di-8-  
210 ANEPPS fluorescence was recorded (excitation by a pair of 50 ms pulses, 438 nm then 531  
211 nm, 3 ms apart, was delivered by the Polychrome II; the emitted fluorescence was filtered  
212 via a dichroic mirror of 570 nm and 585/20 nm emission band-pass filter (Chroma  
213 Technology Corp., Bellows Falls, VT, USA)). Subsequently, the protoplast was illuminated  
214 for 5-10 min with either RL (660 nm,  $220 \mu\text{mol m}^{-2} \text{s}^{-1}$ ) or RL+BL ( $220 \mu\text{mol m}^{-2} \text{s}^{-1}$ , BL  
215 450 nm, 10-15% of the total intensity) and a second pair of fluorescence images was  
216 recorded as above. The images were processed using FIJI (Abràmoff et al., 2004;  
217 Schindelin et al., 2012) to yield a pixel-by-pixel fluorescence ratio as described earlier  
218 (Wigoda et al., 2017).

219 *Fluorescence ratio calibration.* BSCs protoplasts incubated in di-8-ANEPPS as above were  
220 subjected to 5 s-long voltage pulses in the range of +17 to -223 mV using a patch-clamp  
221 pipette in a whole-cell configuration. A pair of images were recorded during the 2<sup>nd</sup> half of  
222 each pulse, during a steady-state. The patch-clamp-imaging setup was described in detail  
223 by Wigoda et al. (2017), except for the current substitution with the abovementioned  
224 Eclipse microscope and IXON camera. This calibration confirmed the positive correlation  
225 between the di-8-ANEPPS fluorescence ratio and depolarization (Suppl. Fig.8).

226 *Solutions.* Di-8-ANEPPS (Molecular probes, Life technologies, cat. # D3167, Oregon,  
227 USA): a 10 mM stock solution in DMSO was stored in 10  $\mu\text{L}$  aliquots at -20 °C.

228 Pluronic F-127 (Molecular probes, Life technologies, cat. # P6867, Oregon, USA), a 20%  
229 stock solution in DMSO was stored in 100  $\mu\text{L}$  aliquots at RT. °C.

230 Bath Solution (in mM): 5 KCl, 1 CaCl<sub>2</sub>, 4 MgCl<sub>2</sub>, 10 MES; pH 5.6; osmolality: 435 mOsm,  
231 adjusted w/ D-sorbitol.

232 Patch-clamp pipette solution (in mM): 112 K-Gluconate, 28 KCl, 2 MgCl<sub>2</sub>, 10 HEPES, 328  
233 Sorbitol, pH 7.5, Osmolarity: 480 mOsm

234 Tyrphostin 9 was added to the bath solution from aliquots used in the detached leaves  
235 experiments.

236 **Leaf vein density measurements** – vein density measurements were performed as in  
237 Grunwald et al., 2020.

238 **Osmotic water permeability coefficient ( $P_f$ ) determination under different light**  
239 **regimes**

240 *Protoplast isolation and  $P_f$  determination* were performed on *SCR:GFP* (Col) as already  
241 described (Shatil-Cohen et al., 2014) with the following modifications: The  $P_f$   
242 determination by the hypo-osmotic challenge (150 mOsm less than in the isotonic solution)  
243 was carried out under either light (6 V-30 W halogen lamp, PHILIPS 5761) or dark  
244 treatment.

245 *Light treatments:* After isolation, the protoplasts were divided in two tubes, one tube (“light  
246 treated”) was kept in constant light in the growth room and the other tube (“dark treated”)  
247 was kept in a light-proof box until the measurements. The light source during the hypo-  
248 osmotic challenge of the light-treated protoplasts was the built-in microscope bulb. During  
249 the osmotic challenge of the dark-treated protoplasts, the room was darkened, protoplasts  
250 were added to the experimental chamber and let sink and stick to the bottom, and a GFP-  
251 positive BSC was quickly located. Next, the microscope light was turned off, and the cell  
252 was kept in the chamber in total darkness for 10 minutes. During the 1 min videotaping of

253 the protoplast's hypoosmotic challenge, the chamber was illuminated by the microscope  
254 lamp via a red plastic band-pass filter ( $\sim 600\text{-}700\text{nm}$ /  $30\ \mu\text{mol m}^{-2}\ \text{sec}^{-1}$ ) to block the BL.  
255 Henceforth, in  $P_f$  experiments, we designate this low-level red light illumination as "Dark".  
256 Both wash solutions (isotonic and hypotonic) were buffered to pH 5.7.

#### 257 **Determination of guttation drops pH**

258 Whole intact WT (Col) plants were covered overnight with black plastic bags to increase  
259 the relative humidity in their atmosphere and to prevent transpiration. The following  
260 morning immediately after the growth room lights went ON), guttation droplets were  
261 collected from the tips of the leaves. Ten to twenty guttation droplets were collected and  
262 pooled to reach a sample volume of approximately  $20\ \mu\text{L}$  in a  $200\text{-}\mu\text{L}$  vial, which was  
263 immediately sealed. pH was measured within 10 min of sample collection using a micro-  
264 pH electrode MI-410 (Microelectrode, Inc., New Hampshire, USA).

265

266

267

268 **RESULTS**

269 **PHOT1 and PHOT2 light receptors are involved in  $K_{\text{leaf}}$  regulation**

270 Following the GC model in which the photoreceptors PHOT1 and PHOT2 transduce the  
271 BL stomatal opening signal, and encouraged by the substantial expression of the blue light  
272 receptor genes *PHOT1* and *PHOT2* in the Arabidopsis BSCs transcriptome (Wigoda et al.,  
273 2017), we explored the role of these two light receptors in the regulation of the leaf  
274 hydraulic conductance,  $K_{\text{leaf}}$ . We compared, under two light regimes, red light (RL) and red  
275 light + blue light (RL+ BL), the  $K_{\text{leaf}}$  of WT plants to  $K_{\text{leaf}}$  of knockout mutants lacking one  
276 or both of these light receptors (*phot1-5*, *phot 2-1* and *phot1-5 phot 2-1*; Fig. 1). Under  
277 RL+BL, WT leaves'  $K_{\text{leaf}}$  was more than 3-fold higher than under RL treatment and more  
278 than 2-fold higher than  $K_{\text{leaf}}$  of the RL+BL-treated three mutants. Also, under RL+BL, *phot*  
279 *2-1* mutant's  $K_{\text{leaf}}$  was about 40 % higher than under the RL treatment. In contrast, BL did  
280 not seem to increase the *phot1-5* mutant's or the double mutant's  $K_{\text{leaf}}$  compared to  $K_{\text{leaf}}$   
281 under the RL treatment. Under RL,  $K_{\text{leaf}}$  did not differ among all the mutants, but while the  
282 WT's  $K_{\text{leaf}}$  was no different than the single-mutants'  $K_{\text{leaf}}$ , it was about double that in the  
283 double mutant (Fig. 1).

284 The higher calculated value of WT's  $K_{\text{leaf}}$  under BL (as compared to RL), resulted from a  
285 greatly increased (less negative) leaf water potential,  $\Psi_{\text{leaf}}$ , and an appreciably higher  
286 transpiration rate,  $E$  (Eq. 1, Materials and methods). This invites the interpretation that the  
287 BL-induced a highly conductive water pathway into the leaf enabling higher radial water  
288 influx which, in turn, was able to compensate for the BL-enhanced  $E$ , i.e. water efflux from  
289 the leaf, via the BL-increased stomata conductance,  $g_s$  (suppl. Fig. S1).

290

291 **BSCs-specific silencing of PHOT1 and PHOT2 receptors decreased  $K_{\text{leaf}}$**

292 To examine specifically the participation of the BSCs' light receptors in the BL-induced  
293  $K_{\text{leaf}}$  increase, we silenced either the *PHOT1* or the *PHOT2* gene using amiRNA (artificial  
294 microRNA) under the BSCs-specific promoter, *SCARECROW* (*SCR*, see Materials and  
295 Methods). Under RL+BL illumination, the  $K_{\text{leaf}}$  values of leaves of both types of transgenic  
296 plants, *SCR:mirphot1* and *SCR:mirphot2*, were lower (by 40 -50 %) than the  $K_{\text{leaf}}$  values of  
297 WT leaves (Fig. 2). In contrast, all the *SCR:mirphot* plants had WT'-like  $g_s$  and E, while  
298 their  $\Psi_{\text{leaf}}$  was lower (by 50-90 %) than WT's suggesting the reduction of radial water  
299 influx to the leaf ( Suppl Fig. S2).

300 **BSCs-specific complementation of the *phot1-5* mutant with PHOT1 restored  $K_{\text{leaf}}$**

301 We complemented the *phot1-5* (Col-gl) mutant plants with *SCR:PHOT1* to restore PHOT1  
302 activity exclusively in the BSCs (Materials and Methods) and compared them to WT (Col-  
303 gl) plants and to *phot1-5* plants. *SCR:PHOT1* plants illuminated with RL+BL had their  
304  $K_{\text{leaf}}$  restored from *phot1-5* values to WT values (Fig. 3). While, as expected, BL increased  
305 the WT's  $g_s$ , the mutant's  $g_s$  and that of the complemented mutant did not change under  
306 BL also as expected from the main-BL-receptor-devoid guard cells (Suppl. Fig. S3).  
307 Notably, under BL, the  $\Psi_{\text{leaf}}$  of the *SCR:PHOT1* complemented mutant was restored to the  
308 WT's values, and both were higher by over 50% than the mutant's  $\Psi_{\text{leaf}}$  (Suppl. Fig. S3).  
309 This was the major contribution to the restored high  $K_{\text{leaf}}$  of the complemented mutant,  
310 suggesting a restoration of radial water influx to the leaf.

311 **The kinase inhibitor, tyrphostin 9, inhibited the RL+BL-induced  $K_{\text{leaf}}$  increase**

312 The kinase inhibitor tyrphostin 9 suppressed the blue-light-dependent  $H^+$ -ATPase  
313 phosphorylation in guard cells (Hayashi et al., 2017). To examine further whether the  
314 vascular PHOT receptors initiate a similarly sensitive phosphorylating event in the BL-

315 dependent  $K_{\text{leaf}}$  regulation pathway, we perfused detached WT leaves with AXS, without  
316 or with 10  $\mu\text{M}$  tyrphostin 9, and exposed them to RL or RL+BL treatments (Materials and  
317 Methods). The  $K_{\text{leaf}}$  values of RL+BL-illuminated leaves perfused with tyrphostin 9 were  
318 about 50% lower than in RL+BL-illuminated control leaves (without tyrphostin 9), and  
319 were no different than  $K_{\text{leaf}}$  in leaves illuminated with RL only (whether or not exposed to  
320 tyrphostin 9; Fig.4a, left panel, suppl. Fig S5). However,  $g_s$  was not affected by the petiole-  
321 fed tyrphostin 9 (Fig.4b, left panel). In contrast to the perfused tyrphostin 9, spraying the  
322 inhibitor on the leaf surface did not interfere with the BL-induced almost 3-fold  $K_{\text{leaf}}$   
323 increase (Fig. 4a, right panel) but it averted the BL-induced  $g_s$  increase (Fig. 4b, right  
324 panel). The impaired stomatal response as a result of tyrphostin 9 application directly on  
325 the leaf surface, is in agreement with (Hayashi et al., 2017) findings in which tyrphostin  
326 9 inhibited BL stomatal opening in epidermal peels. The leaf transpiration,  $E$ , behaved in  
327 a pattern similar to  $g_s$  (Suppl. Fig S4a). Petiole-fed tyrphostin 9 abolished the BL-induced  
328 increase of  $\Psi_{\text{leaf}}$ , but tyrphostin 9 sprayed on the leaf surface did not prevent it (Suppl. Fig  
329 S4b).

### 330 **BL hyperpolarizes the BSCs**

331 To investigate further whether the BSCs plasma-membrane  $\text{H}^+$ -ATPases plays a role in the  
332 BL signal transduction pathway, resembling GCs, we monitored the membrane potential of  
333 BSC protoplasts using the potentiometric dual-excitation dye di-8-ANEPPS. Indeed, 5-10  
334 min of RL+BL illumination hyperpolarized the BSCs protoplasts relative to RL  
335 illumination or to Dark (absence of illumination), while 10  $\mu\text{M}$  tyrphostin 9 added in the  
336 bath (Materials and Methods) not only abolished the BL-induced hyperpolarization but  
337 even depolarized the BSCs (Fig. 5, Suppl. Fig. S8), linking BL to the activity of plasma  
338 membrane proton pumps.

339 **AHA2 plays a role in the BL-induced  $K_{\text{leaf}}$  regulation**

340 Recently, we reported that AHA2 plays a major role in  $K_{\text{leaf}}$  regulation by acidifying the  
341 xylem sap. To test further whether the BSC's  $H^+$ -ATPase AHA2 participates in the blue  
342 light-initiated  $K_{\text{leaf}}$  regulation pathway, we examined the AHA2 knockout mutant *aha2-4*,  
343 and its BSCs-complemented transgenic plant line *SCR:AHA2* (i.e., the *aha2-4* mutant with  
344 AHA2 expressed only in its BSCs (Grunwald et al., 2020)) under the two light regimes (RL  
345 and RL+BL).  $K_{\text{leaf}}$  of *aha2-4* leaves did not respond to the RL+BL illumination and was  
346 only about 40 % of  $K_{\text{leaf}}$  of the BL-treated WT leaves, but, a similar illumination increased  
347  $K_{\text{leaf}}$  of the AHA2-complemented (*SCR:AHA2*) plants to almost 65 % of the WT's  $K_{\text{leaf}}$  (Fig.  
348 6), indicating that the BL-induced  $K_{\text{leaf}}$  increase depended on AHA2. In contrast, under  
349 RL+BL,  $E$  and  $g_s$  of *SCR:AHA2* did not differ from  $E$  and  $g_s$  of the *aha2-4* mutant, and they  
350 remained unaffected by BL and lower than the WT's  $E$  and  $g_s$  (Suppl. Fig S5a & b).  
351 Notably,  $\Psi_{\text{leaf}}$  of *SCR:AHA2* was higher by about 40 % than the mutant's and did not differ  
352 from the WT's  $\Psi_{\text{leaf}}$  suggesting a restoration of radial water influx to the leaf (Suppl. Fig  
353 S5c).

354 **Morning light after night darkness acidifies the xylem sap**

355 In order to find out whether – like in GCs – the BSC apoplast, i.e., the xylem sap, is more  
356 alkaline at night and changes to more acidic in the morning, we first measured the pH of  
357 guttation drops collected from the tips of WT leaves before “dawn” (i.e., before lights-ON,  
358 Materials and Methods) and found that their mean pH was 7.3. Next, we measured the  
359 xylem sap pH in detached leaves, comparing leaves before dawn to leaves after dawn (i.e.,  
360 leaves at the end of an overnight dark treatment, to leaves after a 30 min WL illumination  
361 in the growth chamber; Materials and Methods). This comparison included leaves of WT,  
362 *phot1-5* and *SCR:PHOT1* plants. Illumination acidified the xylem sap in WT plants by  
363 approx. 0.6 pH units, from 6.0 to 5.4 and in the *SCR: PHOT1* plants by approx. 0.8 pH

364 units, from 6.1 to 5.3, while the xylem pH in *phot1-5* remained unchanged, at about 5.9  
365 (Fig. 7), suggesting that PHOT1 in the BSCs is necessary for light-activated xylem  
366 acidification.

### 367 **Light increases the osmotic water permeability, $P_f$ , of the BSCs**

368 To delve further into the link between light and  $K_{leaf}$ , we tested whether light affects the  
369 osmotic water permeability ( $P_f$ ) of the BSCs membrane. We determined the  $P_f$  of isolated  
370 BSC protoplasts from videotapes of their swelling during a hypotonic challenge after white  
371 light (WL) illumination or after darkening for 10 min (Materials and Methods). The  
372 illuminated BSCs had higher  $P_f$  than the dark-treated ones (Fig. 8), suggesting that light is  
373 necessary for the increased water fluxes from the xylem to the mesophyll at first light.

### 374 **Leaf vein architecture is not affected by the expression of PHOT1 or PHOT2**

375 In order to rule out that the diminished  $K_{leaf}$  in response to BL of the Phot receptor mutants  
376 we observed, were due to differences in leaf architecture and morphology, we quantified  
377 the vein density in all lines we studied and found no differences among them (Suppl. Fig  
378 S9).

379

380

381



382 **DISCUSSION**

383 **BL signal transduction in the BSCs compared to the GC's BL signal transduction**

384 Stomatal opening, as well as chloroplasts movement in response to BL (Zeiger et al., 1983;  
385 Sakai et al., 2001) are considered the outcomes of a “classical” short-term BL-induced  
386 signaling pathway mediated by PHOT1 and PHOT2 photoreceptors (Kinoshita et al.,  
387 2001b; and reviewed by Briggs and Christie, 2002).

388 We argue here that a similar and autonomous BL signaling mechanism underlies the  
389 increase of  $K_{\text{leaf}}$  by BL in Arabidopsis. To explain the underlying mechanism, we build on  
390 our earlier findings that, on the one hand, the BSCs express substantial levels of *PHOT1*  
391 and *PHOT2* receptors (Wigoda et al., 2017) and, on the other hand,  $K_{\text{leaf}}$  is enhanced by  
392 xylem sap acidification by the BSCs' AHA2 (Grunwald et al., 2020). Here, we link these  
393 findings using the PHOT receptors mutants *phot1-5* and *phot2-1*, and the double mutant  
394 *phot1-5 phot2-1*, and, moreover, we focus on the roles of both receptors PHOT1 and  
395 PHOT2 specifically in the BSCs and demonstrate the independence of the BSCs' BL  
396 signaling from the GCs' BL signaling. This notion of independence is particularly  
397 important since the BSC layer constitutes a hydraulic valve between the xylem and the leaf,  
398 regulating water loss to the atmosphere *in series* with the GCs apertures.

399 The similarity of BSCs BL-signaling to the stomata-opening BL-signaling, is highlighted  
400 by the requirement for the presence of both active PHOT1 and PHOT2 receptors for the  
401 BL-induced increase of  $K_{\text{leaf}}$  and  $g_s$ ; we base this conclusion on the particularly severe  
402 depression of both responses in the double mutant relative to the two single mutants'  
403 responses (13 % of the WT's  $K_{\text{leaf}}$  BL response remaining in the double mutant, vs 32 and  
404 40 % of the WT's  $K_{\text{leaf}}$  in *phot1-5* and in *phot2-1*, respectively (Fig.1), and 35% of the WT's  
405  $g_s$  BL response remaining in the double mutant, vs 57 % and 71% of the WT's  $g_s$  in *phot1-*

406 5 and in *phot2-1*, respectively (Suppl. Fig.S1a; similar BL effects on stomatal appature in  
407 these mutants have been reported earlier (Kinoshita et al., 2001)).

408 Similar between the two systems (BSCs and GCs) is also the slightly higher sensitivity to  
409 BL in the *phot2-1* mutant seen both in  $K_{leaf}$  (Fig.1) and in  $g_s$  (Suppl. Fig.S1a), the latter also  
410 already noted earlier (Kinoshita et al., 2001), and both likely due to the presence of PHOT1.  
411 Notably, based on the complete abolishment of the BL- $K_{leaf}$  response in the *phot1-5* mutant,  
412 PHOT2 would appear completely redundant, were it not for the even more severe  
413 impairment of the double mutant's  $K_{leaf}$  (even below the WT's  $K_{leaf}$  under RL alone) (Fig.1).  
414 Interestingly, after 2-4 hours of illumination (beyond our usual 15 minutes of illumination)  
415 the *phot* single mutants's  $g_s$  re-acquired the WT-like BL sensitivity (Suppl. Fig. S7), similar  
416 to an earlier report on stomatal aperture after 2-4 hours of BL illumination (Kinoshita et al.,  
417 2001); this could perhaps reflect a gradually accumulating effect of the GCs' AHA activity,  
418 overcoming the partially impaired PHOT-to-AHA signal transduction in the single *phot*  
419 mutants.

420 That the PHOTs (and particularly PHOT1) are indispensable to BL signaling in the BSCs,  
421 as they are in GCs, is emphasized additionally by our two genetic manipulations focused  
422 entirely on the BSCs: (a) the severe impairment of the BL-induced  $K_{leaf}$  increase in WT  
423 plants with either PHOT1 or PHOT2 silenced by *SCR:PHOT-mirs* (Fig. 2) and (b) the full  
424 restoration of  $K_{leaf}$  sensitivity to BL by *phot1-5* complementation with *SCR:PHOT1* (Fig.  
425 3).

426 While the results of these genetic manipulations on the BSCs PHOTs attest, importantly,  
427 to their involvement in the BL regulation of radial water influx to the leaf, they also

428 emphasize the independence of the BSCs BL signal transduction from that in the GCs – as  
429 deduced from the lack of their effect on the  $g_s$  (Suppl. Figs. S2a, S3a).

430 Additionally, the localized effects of the PHOT inhibitor, tyrphostin 9 demonstrated both  
431 the similarity between the BSCs' and the GC's BL signaling pathways in WT plants and  
432 the independence of the first from the latter; both signaling pathways were inhibited by it,  
433 but only when it was applied in close proximity to the tissue of action: BSCs were affected  
434 only by the petiole-fed tyrphostin 9, which inhibited the BL-induced increase of  $K_{leaf}$  and  
435  $\Psi_{leaf}$  without affecting  $g_s$ , while GCs were affected only by tyrphostin 9 sprayed on the leaf  
436 surface (i.e., on GCs), which abolished the BL-induced  $g_s$  increase without affecting  $K_{leaf}$   
437 (Fig.4, suppl. Fig. S4).

#### 438 **The cellular BL signal transduction pathway of the BSCs**

439 The BSCs hyperpolarization in response to BL that we observed (Fig. 5) resembles the GCs  
440 hyperpolarization in response to BL (Assmann et al., 1985; Roelfsema et al., 2001; Taylor  
441 and Assmann, 2001) and its inhibition by tyrphostine (Fig. 5) suggests the involvement of  
442 the PHOT receptors in a similar way (Hayashi et al., 2017). Hyperpolarization is known to  
443 be generated by the plasma membrane  $H^+$ -ATPase activity (Spanswick, 1981). Recently we  
444 reported that the BSCs  $H^+$ -ATPase plays a major role in the acidification of the xylem sap  
445 which in turn increases  $K_{leaf}$  (Grunwald et al., 2020). Indeed – compared to WT – the  $H^+$ -  
446 ATPase mutant, *aha2-4* had a diminished BL-induced  $K_{leaf}$  increase (possibly due to a more  
447 alkaline xylem pH), as well as a diminished BL-induced  $g_s$  increase, while *aha2-4* with the  
448 *SCR:AHA2* complementation limited to BSCs had its BL-induced  $K_{leaf}$  increase restored,  
449 while its  $g_s$  remained unaffected, affirming the mediation by *AHA2* of the BL increase of  
450  $K_{leaf}$  (Fig. 6, Suppl. Fig. S6). Notably, this is an interesting contrast with the otherwise  
451 similar GCs' BL-signaling pathway, which terminates upon *AHA1* (Yamauchi et al., 2016).

452 Previously, we also reported (Grunwald et al., 2020) that the regulation of  $K_{\text{leaf}}$  by the xylem  
453 sap pH was mediated via the effect of the BSCs apoplastic pH (i.e., of the xylem sap pH)  
454 on their osmotic water permeability,  $P_f$ . We showed that the BSCs  $P_f$  increased when the  
455 apoplastic pH declined due to the BSCs  $H^+$ -ATPase activity. Here, we report that, in  
456 addition to external low pH, light is also needed for the BSCs  $P_f$  increase (Fig.8). The role  
457 of BSCs aquaporins in controlling  $K_{\text{leaf}}$  was already identified earlier (in walnut, Ben Baaziz  
458 et al., 2012; in grapevine, Vitali et al., 2016; in poplar, Muries et al., 2019; in Arabidopsis,  
459 Sade et al., 2014; Prado et al., 2019). In particular, Prado et al., (2019) demonstrated a  
460 contribution of the abundant – also in the leaf veins – aquaporin AtPIP2;1 to the rhythmicity  
461 of the diurnal and circadian hydraulic conductance of the Arabidopsis rosette,  $K_{\text{ros}}$ , which  
462 peaked before mid-day. Thus, in addition to the likely  $P_f$ -promoting effect of the slightly  
463 acidic pH (6) perfusion solution (YG,NW et al., 2020) that Prado et al. (2019) used in  
464 their  $K_{\text{ros}}$  measurements, the changes in  $K_{\text{ros}}$  reflected also the effects of light and the  
465 circadian clock (Prado et al., (2019).

466 Elaborating on the correlation between  $K_{\text{ros}}$  and AtPIP2;1 phosphorylation that they found,  
467 these authors demonstrated that frog oocytes expressing AtPIP2;1 had higher  $P_f$  induced by  
468 co-expressing two of the Arabidopsis 14-3-3 protein isoforms which bound to the AtPIP2;1  
469 (Prado et al., 2019). It would be tempting to speculate, on this basis, that, resembling the  
470 PHOT-initiated BL signaling cascade involving 14-3-3 proteins which bind to and  
471 upregulate the GCs' AHA1 activity (e.g., Emi et al., 2001) also AtPIP2;1 activity, and  
472 perhaps that of other vascular aquaporins may be enhanced by light via similar signaling  
473 (i.e., by phosphorylation and 14-3-3 protein binding).

474 An alternative tempting speculation would be that the light-induced BSCs'  $P_f$  increase is  
475 due to BL-mediated activation of AHA2 and the BSCs' cytosol alkalinization resulting from

476 proton secretion. Earlier work already documented that  $P_f$  increases due to aquaporin  
477 activation by cytosol alkalization, mediated by conserved histidine (His 197 in AtPIP2;2;  
478 Tournaire-Roux et al., 2003) and a leucine (Leu206 in BvPIP2;2 Fortuna et al., 2019) in  
479 the cytosol-facing D loop of the aquaporin protein. Moreover, could the concurrent  
480 hyperpolarization of BSCs by BL (also via AHA2 activation) imply a possible role of  
481 hyperpolarization in the regulation of the BSCs AQP<sub>s</sub> as suggested by in-silico simulations  
482 (Hub et al., 2010)? This possibility needs yet to be explored experimentally.

483 The model of  $K_{leaf}$  activation by BL, in a GC-like BL signal transduction pathway, that our  
484 results support, is as follows: the BSCs' PHOT1 and PHOT2 (only partially redundant)  
485 perceive the blue light, activate the plasma membrane  $H^+$ -ATPase (AHA2), which  
486 hyperpolarizes the BSCs and acidifies the xylem pH, leading to an increase of the BSC  $P_f$   
487 and, in turn, to a rise of  $K_{leaf}$ , or, schematically:

488 **BL → BSCs' PHOTs activation → tyrosin phosphorylation\* → BSCs'  $H^+$ -ATPase**  
489 **(AHA2) activation → BSCs hyperpolarization and xylem acidification → BSCs  $P_f$**   
490 **elevation →  $K_{leaf}$  increase.**

491 \* Notably, the abovementioned tyrosine phosphorylation step – suggested to occur, in the  
492 guard cells, on the BHP protein upstream of the  $H^+$ -ATPase (Hayashi et al., 2017) – is yet  
493 to be explored in the BSCs; currently, our guess is that similarly to the GC, this step occurs  
494 upstream of the BSCs' AHA2 (Fig. 9).

#### 495 **The physiological relevance of $K_{leaf}$ increase by blue light**

496 Both GCs opening and  $K_{leaf}$  increase occur in the early morning hours (e.g., Brodribb and  
497 Holbrook, 2004; Domec et al., 2009; Locke and Ort, 2015) when the irradiance spectrum  
498 is relatively enriched in blue wavelengths (Chiang et al., 2019, Matthews et al., 2020, and  
499 references therein). We suggest that the advantage of this blue light response of stomata is

500 in allowing the acquisition of CO<sub>2</sub> during sub-maximum VPD (vapor pressure deficit, a  
501 measure of the driving force for leaf water evaporation), thus increasing water use  
502 efficiency (WUE).

503

504 **What is the advantage of such early K<sub>leaf</sub> response to light?**

505 Interestingly, not only does K<sub>leaf</sub> increase in response to blue light as does stomatal aperture  
506 but, in accord with our conclusions about the independence of the BSCs' BL signal  
507 transduction from that of the GCs', K<sub>leaf</sub> responds to light faster than g<sub>s</sub> (Guyot et al., 2012).  
508 One possible advantage of this, could be to match stomata opening with increased water  
509 flux into the leaf. Were it not for this accompanying K<sub>leaf</sub> increase, BL-induced stomata  
510 opening, which peaks in the morning hours (the "Golden hour"; Gosa et al., 2018), could  
511 accumulate an imbalance of leaf water, even in the presence of a relatively low VPD,  
512 leading to a drop in the leaf water potential ( $\Psi_{leaf}$ ); this in turn, could close stomata  
513 (Raschke, 1970; Guyot et al., 2012; Klein, 2014; Scoffoni et al., 2018) and thus limit  
514 photosynthesis. Instead, an early morning increase of K<sub>leaf</sub> would elevate  $\Psi_{leaf}$  thereby  
515 increasing and prolonging the opening stomata (ibid). Thus, the BL-response of K<sub>leaf</sub> could  
516 support and enhance the stomata BL response. Hypothetically, under more extreme  
517 conditions, e.g., with high VPD already in the early morning, increased K<sub>leaf</sub> would prevent  
518 a hydraulic pathway failure when stomatal conductance is at its peak ( Brodrribb and  
519 Holbrook, 2004; Halperin et al., 2017; Gosa et al., 2019).

520 Another possible advantage of the early morning BL-induced K<sub>leaf</sub> increase may be related  
521 to CO<sub>2</sub> permeability via aquaporins. A few lines of evidence converge to support this  
522 hypothesis: (a) CO<sub>2</sub> can cross cell membranes through aquaporins, and, in particular, those  
523 of the PIP1 family, and (b) the transcripts of PIP1 family aquaporins were upregulated  
524 concomitantly with K<sub>leaf</sub> increase in walnut by white light illumination (as short as a 15  
525 min; Biaaziz et al., 2012), (c) in soybean, the transcript of a PIP1 family aquaporin (PIP1;8)

526 was more abundant in the morning than in midday in correlation with a higher  $K_{\text{leaf}}$  in the  
527 morning than in the midday (Locke and Ort, 2015), (d) we demonstrated that aquaporins  
528 control  $K_{\text{leaf}}$  (Shatil-Cohen and Moshelion, 2012; Sade et al., 2014); (e) xylem-transported  
529  $\text{CO}_2$  could be a source for  $\text{CO}_2$  assimilated in the bundle sheath and mesophyll (Janacek et  
530 al., 2009; Hubeau et al., 2019). Thus, assuming the  $K_{\text{leaf}}$  increase with the first light of day  
531 parallels the increase of  $\text{CO}_2$  permeability of aquaporins in the BSCs, the passage to the  
532 mesophyll of  $\text{CO}_2$  from the xylem originating in roots respiration will be enhanced even  
533 before full stomatal opening. The increased  $\text{CO}_2$  availability at this time, when the  
534 photosynthetic light is already sufficient, would enhance  $\text{CO}_2$  assimilation – a great  
535 advantage to the plant. Interestingly, photosynthetic  $\text{CO}_2$  uptake reaches a maximum within  
536 10 minutes of blue light (Doi et al., 2015), which is over threefold faster than the full  
537 opening of stomata (Grondin et al., 2015). In conclusion, our data provide new evidence  
538 for the role of the BSCs' phototropins (PHOT1 and PHOT2) in their AHA2-mediated  
539 increase of  $K_{\text{leaf}}$  by blue light.

540 An additional interesting outcome from our results is the corroboration – and explanation –  
541 of the reports on alkalized xylem sap pH in the absence of light, e.g., at night (Urrestarazu  
542 et al., 1996 (in tomatoes); Aubrey et al., 2011 (in poplars)), or even on cloudy days (in  
543 poplars; Aubrey et al., 2011). Similarly, in Arabidopsis, only after dawn and the activation  
544 of the BL signal transduction pathway does the xylem sap become acidic (as in Fig.7) and  
545  $K_{\text{leaf}}$  increases (Fig. 3).

546 Our results, together with the fact that in the dark the BSC  $P_f$  is low (Fig. 8), may explain  
547 how the mesophyll does not get flooded at night when root pressure increases. While during  
548 day time the BSCs' higher  $P_f$  underlies the higher  $K_{\text{leaf}}$  which is important for the support  
549 of transpiration (Sade et al., 2015; Shatil-Cohen and Moshelion, 2012; Grunwald et al.,  
550 2020; Sade et al., 2014), at night, the  $P_f$  and  $K_{\text{leaf}}$  reduction likely prevents water influx into

551 the leaf, and the buildup of root pressure is relieved via guttation, and if not — xylem sap  
552 may flood the leaf (Shatil-Cohen and Moshelion, 2012). Not surprisingly, and in accord  
553 with the dark-alkalinization of the xylem sap, guttation drops pH was  $7.2 \pm 0.04$  ( $\pm$ SE, 15  
554 biological repeats/ collected over three days).

555 The inactivity of the BSCs  $H^+$ -ATPases, manifested in the nightly alkalinization of the  
556 xylem sap, could be advantageous for the plant as a means of energy conservation, as  
557 ATPases operate at a high energetic cost (Palmgren, 2001).

558 These findings expand our understanding of the molecular basis of the leaf water influx  
559 regulation. That BL increases  $K_{leaf}$  in several other species (Voicu et al., 2008; Voicu et al.,  
560 2009; Sellin et al., 2011; Aasamaa and Sber, 2012; Ben Baaziz et al., 2012), imparts an  
561 even more general importance to our results. Thus, a focus on the hydraulic valve in series  
562 with the stomata should provide new directions for studying the plant water relations within  
563 its environment.

564

## 565 REFERENCES

566 **Aasamaa, K. and Söber, A.** (2012). Light sensitivity of shoot hydraulic conductance in  
567 five temperate deciduous tree species. *Funct. Plant Biol.* **39**: 661.

568 **Abràmoff, M.D., Magalhães, P.J., and Ram, S.J.** (2004). Image processing with  
569 imageJ. *Biophotonics Int.* **11**: 36–41.

570 **Alvarez, J.P., Pekker, I., Goldshmidt, A., Blum, E., Amsellem, Z., and Eshed, Y.**  
571 (2006). Endogenous and Synthetic MicroRNAs Stimulate Simultaneous, Efficient, and  
572 Localized Regulation of Multiple Targets in Diverse Species. *Plant Cell* **18**: 1134–1151.

573 **Assmann, S.** (1993). Signal Transduction in Guard Cells. *Annu. Rev. Cell Dev. Biol.* **9**:  
574 345–375.



- 575 **Assmann, S.M., Simoncini, L., and Schroeder, J.I.** (1985). Blue light activates  
576 electrogenic ion pumping in guard cell protoplasts of *Vicia faba*. *Nature* **318**: 285–287.
- 577 **Aubrey, D.P., Boyles, J.G., Krysinsky, L.S., and Teskey, R.O.** (2011). Spatial and  
578 temporal patterns of xylem sap pH derived from stems and twigs of *Populus deltoides* L.  
579 *Environ. Exp. Bot.* **71**: 376–381.
- 580 **Ben Baaziz, K., Lopez, D., Rabot, A., Combes, D., Gousset, A., Bouzid, S., Cochard,**  
581 **H., Sakr, S., and Venisse, J.-S.** (2012). Light-mediated Kleaf induction and contribution  
582 of both the PIP1s and PIP2s aquaporins in five tree species: walnut (*Juglans regia*) case  
583 study. *Tree Physiol.* **32**: 423–434.
- 584 **Briggs, W.R. and Christie, J.M.** (2002). Phototropins 1 and 2: Versatile plant blue-light  
585 receptors. *Trends Plant Sci.* **7**: 204–210.
- 586 **Briggs, W.R. and Huala, E.** (1999). Blue-Light Photoreceptors in Higher Plants. *Annu.*  
587 *Rev. Cell Dev. Biol.* **15**: 33–62.
- 588 **Brodribb, T.J. and Holbrook, N.M.** (2004). Diurnal depression of leaf hydraulic  
589 conductance in a tropical tree species. *Plant, Cell Environ.* **27**: 820–827.
- 590 **Chiang, C., Olsen, J.E., Basler, D., Bånkestad, D., and Hoch, G.** (2019). Latitude and  
591 Weather Influences on Sun Light Quality and the Relationship to Tree Growth. *Forests*  
592 **10**: 610.
- 593 **Clough, S.J. and Bent, A.F.** (1998). Floral dip: A simplified method for *Agrobacterium*-  
594 mediated transformation of *Arabidopsis thaliana*. *Plant J.* **16**: 735–743.
- 595 **Doi, M., Kitagawa, Y., and Shimazaki, K.-I.** (2015). Stomatal Blue Light Response Is  
596 Present in Early Vascular Plants. *Plant Physiol.* **169**: 1205–1213.
- 597 **Domec, J.C., Noormets, A., King, J.S., Sun, G., McNulty, S.G., Gavazzi, M.J., Boggs,**  
598 **J.L., and Treasure, E.A.** (2009). Decoupling the influence of leaf and root hydraulic  
599 conductances on stomatal conductance and its sensitivity to vapour pressure deficit as soil

- 600 dries in a drained loblolly pine plantation. *Plant, Cell Environ.* **32**: 980–991.
- 601 **Elmore, J.M. and Coaker, G.** (2011). The Role of the Plasma Membrane H<sup>+</sup>-ATPase in  
602 Plant–Microbe Interactions. *Mol. Plant* **4**: 416–427.
- 603 **Emi, T., Kinoshita, T., and Shimazaki, K.** (2001). Specific binding of vf14-3-3a  
604 isoform to the plasma membrane H<sup>+</sup>-ATPase in response to blue light and fusicoccin in  
605 guard cells of broad bean. *Plant Physiol.* **125**: 1115–1125.
- 606 **Fortuna, C.A., Zerbetto De Palma, G., Aliperti Car, L., Armentia, L., Vitali, V.,**  
607 **Zeida, A., Estrin, D.A., and Alleva, K.** (2019). Gating in plant plasma membrane  
608 aquaporins: the involvement of leucine in the formation of a pore constriction in the  
609 closed state. *FEBS J.* **286**: 3473–3487.
- 610 **Gosa, S.C., Lupo, Y., and Moshelion, M.** (2019). Quantitative and comparative analysis  
611 of whole-plant performance for functional physiological traits phenotyping: New tools to  
612 support pre-breeding and plant stress physiology studies. *Plant Sci.* **282**: 49–59.
- 613 **Gronzin, A., Rodrigues, O., Verdoucq, L., Merlot, S., Leonhardt, N., and Maurel, C.**  
614 (2015). Aquaporins Contribute to ABA-Triggered Stomatal Closure through OST1-  
615 Mediated Phosphorylation. *Plant Cell* **27**: 1945–1954.
- 616 **Grunwald, Y., Wigoda, N., Sade, N., Yaaran, A., Torne, T., Gosa, S.C., Moran, N.,**  
617 **and Moshelion, M.** (2020). Arabidopsis leaf hydraulic conductance is regulated by  
618 xylem-sap pH, controlled, in turn, by a P-type H<sup>+</sup>-ATPase of vascular bundle sheath cells.  
619 bioRxiv: 234286.
- 620 **Guyot, G., Scoffoni, C., and Sack, L.** (2012). Combined impacts of irradiance and  
621 dehydration on leaf hydraulic conductance: insights into vulnerability and stomatal  
622 control. *Plant. Cell Environ.* **35**: 857–871.
- 623 **Halperin, O., Gebremedhin, A., Wallach, R., and Moshelion, M.** (2017). High-  
624 throughput physiological phenotyping and screening system for the characterization of

- 625 plant-environment interactions. *Plant J.* **89**: 839–850.
- 626 **Hayashi, M., Inoue, S., Ueno, Y., and Kinoshita, T.** (2017). A Raf-like protein kinase  
627 BHP mediates blue light-dependent stomatal opening. *Sci. Rep.* **7**: 45586.
- 628 **Hsiao, T.C., Allaway, W.G., and Evans, L.T.** (1973). Action Spectra for Guard Cell Rb  
629 + Uptake and Stomatal Opening in *Vicia faba*. *Plant Physiol.* **51**: 82–88.
- 630 **Hub, J.S., Aponte-Santamaría, C., Grubmüller, H., and De Groot, B.L.** (2010).  
631 Voltage-regulated water flux through aquaporin channels in silico. *Biophys. J.* **99**: L97–  
632 L99.
- 633 **Hubeau, M., Thorpe, M.R., Mincke, J., Bloemen, J., Bauweraerts, I., Minchin,  
634 P.E.H., De Schepper, V., De Vos, F., Vanhove, C., Vandenberghe, S., and Steppe, K.**  
635 (2019). High-Resolution in vivo Imaging of Xylem-Transported CO<sub>2</sub> in Leaves Based on  
636 Real-Time <sup>11</sup>C-Tracing. *Front. For. Glob. Chang.* **2**: 25.
- 637 **Van Ieperen, W., Savvides, A., and Fanourakis, D.** (2012). Red and blue light effects  
638 during growth on hydraulic and stomatal conductance in leaves of young cucumber  
639 plants. *Acta Hort.* **956**: 223–230.
- 640 **Janacek, S.H., Trenkamp, S., Palmer, B., Brown, N.J., Parsley, K., Stanley, S.,  
641 Astley, H.M., Rolfe, S.A., Paul Quick, W., Fernie, A.R., and Hibberd, J.M.** (2009).  
642 Photosynthesis in cells around veins of the C<sub>3</sub> plant *Arabidopsis thaliana* is important for  
643 both the shikimate pathway and leaf senescence as well as contributing to plant fitness.  
644 *Plant J.* **59**: 329–343.
- 645 **Karlsson, P.E.** (1986). Blue light regulation of stomata in wheat seedlings. II. Action  
646 spectrum and search for action dichroism. *Physiol. Plant.* **66**: 207–210.
- 647 **Kinoshita, T., Doi, M., Suetsugu, N., Kagawa, T., Wada, M., and Shimazaki, K.**  
648 (2001). Phot1 and Phot2 mediate blue light regulation of stomatal opening. *Nature* **414**:  
649 656–660.

- 650 **Kinoshita, T. and Shimazaki, K.** (1999). Blue light activates the plasma membrane H<sup>+</sup>-  
651 ATPase by phosphorylation of the C-terminus in stomatal guard cells. *EMBO J.* **18**:  
652 5548–5558.
- 653 **Klein, T.** (2014). The variability of stomatal sensitivity to leaf water potential across tree  
654 species indicates a continuum between isohydric and anisohydric behaviours. *Funct. Ecol.*  
655 **28**: 1313–1320.
- 656 **Kronenberg, G.H.M. and Kendrick, R.E.** (1986). The physiology of action. In  
657 *Photomorphogenesis in plants* (Springer Netherlands: Dordrecht), pp. 99–114.
- 658 **Locke, A.M. and Ort, D.R.** (2015). Diurnal depression in leaf hydraulic conductance at  
659 ambient and elevated [CO<sub>2</sub>] reveals anisohydric water management in field-grown  
660 soybean and possible involvement of aquaporins. *Environ. Exp. Bot.* **116**: 39–46.
- 661 **Matthews, J.S., Violet-Chabrand, S., Lawson, T., and Evans, J.** (2020). Role of blue  
662 and red light in stomatal dynamic behaviour. *J. Exp. Bot.* **71**: 2253–2269.
- 663 **Muries, B. et al.** (2019). Aquaporins and water control in drought-stressed poplar leaves:  
664 A glimpse into the extraxylem vascular territories. *Environ. Exp. Bot.* **162**: 25–37.
- 665 **Negin, B. and Moshelion, M.** (2017). The advantages of functional phenotyping in pre-  
666 field screening for drought-tolerant crops. *Funct. Plant Biol.* **44**: 107.
- 667 **Oishi, A.C., Oren, R., Novick, K.A., Palmroth, S., and Katul, G.G.** (2010). Interannual  
668 Invariability of Forest Evapotranspiration and Its Consequence to Water Flow  
669 Downstream. *Ecosystems* **13**: 421–436.
- 670 **Den Os, D., Staal, M., and Elzenga, J.T.M.** (2007). Signal integration by ABA in the  
671 blue light-induced acidification of leaf pavement cells in pea (*Pisum sativum* L. var.  
672 *Argenteum*). *Plant Signal. Behav.* **2**: 146–152.
- 673 **Palmgren, M.G.** (2001). Plant plasma membrane H<sup>+</sup>ATPases: Powerhouses for nutrient  
674 uptake.

- 675 **Prado, K. and Maurel, C.** (2013). Regulation of leaf hydraulics: from molecular to  
676 whole plant levels. *Front. Plant Sci.* **4**: 1–14.
- 677 **Raschke, K.** (1970). Stomatal Responses to Pressure Changes and Interruptions in the  
678 Water Supply of Detached Leaves of *Zea mays* L. *Plant Physiol.* **45**: 415–423.
- 679 **Roelfsema, M.R.G. and Hedrich, R.** (2005). In the light of stomatal opening: new  
680 insights into ‘the Watergate.’ *New Phytol.* **167**: 665–691.
- 681 **Roelfsema, M.R.G., Steinmeyer, R., Staal, M., and Hedrich, R.** (2001). Single guard  
682 cell recordings in intact plants: Light-induced hyperpolarization of the plasma membrane.  
683 *Plant J.* **26**: 1–13.
- 684 **Sade, N., Shatil-Cohen, A., Attia, Z., Maurel, C., Boursiac, Y., Kelly, G., Granot, D.,**  
685 **Yaaran, A., Lerner, S., and Moshelion, M.** (2014). The Role of Plasma Membrane  
686 Aquaporins in Regulating the Bundle Sheath-Mesophyll Continuum and Leaf Hydraulics.  
687 *PLANT Physiol.* **166**: 1609–1620.
- 688 **Sade, N., Shatil-Cohen, A., and Moshelion, M.** (2015). Bundle-sheath aquaporins play a  
689 role in controlling Arabidopsis leaf hydraulic conductivity. *Plant Signal. Behav.* **10**:  
690 e1017177.
- 691 **Sakai, A.K. et al.** (2001). The Population Biology of Invasive Species. *Annu. Rev. Ecol.*  
692 *Syst.*
- 693 **Schindelin, J. et al.** (2012). Fiji: an open-source platform for biological-image analysis.  
694 *Nat. Methods* **9**: 676–682.
- 695 **Scoffoni, C., Albuquerque, C., Cochard, H., Buckley, T.N., Fletcher, L.R.,**  
696 **Caringella, M.A., Bartlett, M., Brodersen, C.R., Jansen, S., and McElrone, A.J.**  
697 (2018). The Causes of Leaf Hydraulic Vulnerability and Its Influence on Gas Exchange in  
698 *Arabidopsis thaliana*. **178**: 1584–1601.
- 699 **Sellin, A., Sack, L., Öunapuu, E., and Karusion, A.** (2011). Impact of light quality on

- 700 leaf and shoot hydraulic properties: A case study in silver birch (*Betula pendula*). *Plant,*  
701 *Cell Environ.* **34**: 1079–1087.
- 702 **Shapira, O., Khadka, S., Israeli, Y., Shani, U., and Schwartz, A.** (2009). Functional  
703 anatomy controls ion distribution in banana leaves: Significance of Na<sup>+</sup> seclusion at the  
704 leaf margins. *Plant, Cell Environ.* **32**: 476–485.
- 705 **Shatil-Cohen, A. and Moshelion, M.** (2012). Smart pipes. *Plant Signal. Behav.* **7**: 1088–  
706 1091.
- 707 **Shatil-Cohen, A., Sibony, H., Draye, X., Chaumont, F., Moran, N., and Moshelion,**  
708 **M.** (2014). Measuring the osmotic water permeability coefficient (P<sub>f</sub>) of spherical cells:  
709 isolated plant protoplasts as an example. *J. Vis. Exp.*: e51652.
- 710 **Shimazaki, K., Doi, M., Assmann, S.M., and Kinoshita, T.** (2007). Light Regulation of  
711 Stomatal Movement. *Annu. Rev. Plant Biol.* **58**: 219–247.
- 712 **Spanswick, R.** (1981). Electrogenic ion pumps. *Annu. Rev. Plant Physiol.* **32**: 67–89.
- 713 **Svennelid, F., Olsson, A., Piotrowski, M., Rosenquist, M., Ottman, C., Larsson, C.,**  
714 **Oecking, C., and Sommarin, M.** (1999). Phosphorylation of Thr-948 at the C Terminus  
715 of the Plasma Membrane H-ATPase Creates a Binding Site for the Regulatory 14-3-3  
716 Protein.
- 717 **Takemiya, A., Sugiyama, N., Fujimoto, H., Tsutsumi, T., Yamauchi, S., Hiyama, A.,**  
718 **Tada, Y., Christie, J.M., and Shimazaki, K.I.** (2013). Phosphorylation of BLUS1  
719 kinase by phototropins is a primary step in stomatal opening. *Nat. Commun.* **4**.
- 720 **Talbott, L.D., Shmayevich, I.J., Chung, Y., Hammad, J.W., and Zeiger, E.** (2003).  
721 Blue Light and Phytochrome-Mediated Stomatal Opening in the *npq1* and *phot1 phot2*  
722 Mutants of *Arabidopsis*. *Plant Physiol.* **133**: 1522–1529.
- 723 **Taylor, A.R. and Assmann, S.M.** (2001). Apparent absence of a redox requirement for  
724 blue light activation of pump current in broad bean guard cells. *Plant Physiol.* **125**: 329–

- 725 338.
- 726 **Ueno, K., Kinoshita, T., Inoue, S., Emi, T., and Shimazaki, K.** (2005). Biochemical  
727 Characterization of Plasma Membrane H<sup>+</sup>-ATPase Activation in Guard Cell Protoplasts  
728 of *Arabidopsis thaliana* in Response to Blue Light. *Plant Cell Physiol.* **46**: 955–963.
- 729 **Urrestarazu, M., Sanchez, A., Lorente, F.A., and Guzmán, M.** (1996). A daily  
730 rhythmic model for pH and volume from xylem sap of tomato plants. *Commun. Soil Sci.*  
731 *Plant Anal.* **27**: 1859–1874.
- 732 **Vitali, M., Cochard, H., Gambino, G., Ponomarenko, A., Perrone, I., and Lovisolo,**  
733 **C.** (2016). VvPIP2;4N aquaporin involvement in controlling leaf hydraulic capacitance  
734 and resistance in grapevine. *Physiol. Plant.* **158**: 284–296.
- 735 **Voicu, M.C., Cooke, J.E.K., and Zwiazek, J.J.** (2009). Aquaporin gene expression and  
736 apoplastic water flow in bur oak (*Quercus macrocarpa*) leaves in relation to the light  
737 response of leaf hydraulic conductance. *J. Exp. Bot.* **60**: 4063–4075.
- 738 **Voicu, M.C., Zwiazek, J.J., and Tyree, M.T.** (2008). Light response of hydraulic  
739 conductance in bur oak (*Quercus macrocarpa*) leaves. *Tree Physiol.* **28**: 1007–1015.
- 740 **Wigoda, N., Moshelion, M., and Moran, N.** (2014). Is the leaf bundle sheath a “smart  
741 flux valve” for K<sup>+</sup> nutrition? *J. Plant Physiol.* **171**: 715–722.
- 742 **Wigoda, N., Pasmanik-Chor, M., Yang, T., Yu, L., Moshelion, M., and Moran, N.**  
743 (2017). Differential gene expression and transport functionality in the bundle sheath  
744 versus mesophyll – a potential role in leaf mineral homeostasis. *J. Exp. Bot.* **68**: 3179–  
745 3190.
- 746 **Yamauchi, S., Takemiya, A., Sakamoto, T., Kurata, T., Tsutsumi, T., Kinoshita, T.,**  
747 **and Shimazaki, K.** (2016). Plasma membrane H<sup>+</sup>-ATPase1 (AHA1) plays a major role  
748 in *Arabidopsis thaliana* for stomatal opening in response to blue light. *Plant Physiol.*:  
749 pp.01581.2016.

750 **Zeiger, E., Assmann, S.M., and Meioner, H.** (1983). The Photobiology of  
751 *Paphiopedilum stomata*: opening under blue lightbut not red light. *Photochem. Photobiol.*  
752 **38**: 627–630.

753 **Zeiger, E. and Helper, P.K.** (1977). Light and Stomatal Function: Blue Light Stimulates  
754 Swelling of Guard Cell Protoplasts. *Science* (80-. ). **196**: 887–889.

755

756

### 757 **FIGURE LEGENDS**

758 **Figure 1: The effect of blue light on  $K_{\text{leaf}}$  of PHOT receptors mutants.**  $K_{\text{leaf}}$  of fully  
759 expanded excised leaves of WT (Col-g1) and *PHOT* mutants (*phot1-5* (Col-g1), *phot2-1*  
760 (Col-g1) and a double mutant, *phot1-5 phot2-1* (Col-g1)) after illumination for 15 min  
761 immediately after dark, with RL ( $220 \mu\text{mol m}^{-2} \text{s}^{-1}$ ), or R+BL ( $220 \mu\text{mol m}^{-2} \text{s}^{-1}$ , consisting  
762 of 90 % RL and 10 % BL; Materials and methods). The columns are mean values ( $\pm$ SE) of  
763 the indicated number of biological repeats from three independent experiments. Different  
764 letters denote significantly different values (ANOVA, *Post hoc* Tukey's test,  $P < 0.05$ ) . Note  
765 the reduced response to RL+BL in the mutant lines.

766 **Figure 2. The effect of RL+BL on the  $K_{\text{leaf}}$  of PHOT1- and PHOT2-silenced (SCR:mir)**  
767 **plants,** generated in WT (Col; Materials and methods).  $K_{\text{leaf}}$  was determined in fully  
768 expanded leaves of WT and *SCR:mirphot1* and *SCR:mirphot2* plants treated with RL or  
769 RL+BL (as in Fig. 1; Materials and Methods) The columns are means ( $\pm$  SE) of the  
770 indicated number of biological repeats from three independent experiments. Different  
771 letters denote significantly different values (ANOVA, *Post hoc* Tukey's test,  $P < 0.05$ ).

772

773 **Figure 3. BSCs-directed *PHOT1* complementation of the *phot1-5* mutant restores the**  
774 **normal  $K_{\text{leaf}}$ .** Fully expanded leaves of WT (Col-g1), *phot1-5* and *phot1-5* (Col-g1) plants  
775 complemented with *SCR:PHOT1* underwent illumination treatments as in Fig. 1. The  
776 columns are means ( $\pm$  SE) of the indicated number of biological repeats from three  
777 independent experiments. Different letters denote significantly different values (ANOVA,,  
778 *Post hoc* Tukey's test,  $P < 0.05$ ).

779



780 **Figure 4. Xylem-fed kinase Inhibitor tyrphostin 9 abolished the blue-light-induced**  
781  **$K_{leaf}$  increase and stomatal opening.** Fully expanded leaves of WT (Col-gl) were pre-  
782 incubated (petiole deep) in AXS without or with tyrphostin 9 (10  $\mu$ M) or sprayed with AXS  
783 without or with tyrphostin 9 (10  $\mu$ M), and kept overnight in dark boxes. Immediately after  
784 dark, leaves were illuminated for 15 min with RL (215  $\mu$ molm<sup>-2</sup> s<sup>-1</sup> red) or RL+BL (215  
785  $\mu$ mol m<sup>-2</sup> s<sup>-1</sup>, consisting of 90 % RL and 10 % BL). **a.**  $K_{leaf}$ . **b.** Stomatal conductance ( $g_s$ ).  
786 The columns are means ( $\pm$  SE) of the indicated number of biological repetitions, determined  
787 in three independent experimental days. Different letters denote significantly different  
788 values (ANOVA, Post hoc Tukey's test,  $P < 0.05$ ). Note that  $g_s$  was reduced when tyrphostin  
789 9 was sprayed but not when fed via the petiole.

790 **Figure 5. - Blue light (BL) hyperpolarizes the BSCs relative to red light (RL) or Dark**  
791 **and tyrphostin 9 depolarizes them.** Membrane potential ( $E_M$ ) of BSC protoplasts, without  
792 or with petiole-fed tyrphostin 9 (10  $\mu$ M), determined using the dual-excitation, ratiometric  
793 fluorescent dye di-8-ANEPPS (Materials and Methods). After at least 10-20 min in the dark,  
794 the cells were immediately imaged (Dark), or illuminated for an additional 5-10 minutes  
795 either with RL (220  $\mu$ mol m<sup>-2</sup> s<sup>-1</sup>) or with RL+BL (220  $\mu$ mol m<sup>-2</sup> s<sup>-1</sup>, including 10% BL;  
796 Materials and Methods), and then imaged. The columns are mean values of fluorescence  
797 ratio ( $F_{438}/F_{531}$ ) values ( $\pm$ SE; n as indicated) derived from analyses of the images captured  
798 at the indicated excitation wavelengths (Materials and Methods) in three independent  
799 experiments. Numbers above the columns are the mean values of BSCs  $E_M$ , based on a  
800 calibration curve of  $F_{438}/F_{531}$  vs.  $E_M$  obtained in separate experiments using patch clamp  
801 (Materials and Methods, Suppl. Fig. S8). Different letters denote significantly different  
802 values (ANOVA, Post hoc Tukey's test,  $P < 0.05$ ).

803

804 **Figure 6. The BSCs  $H^+$ -ATPase, AHA2, mediates the blue-light-induced  $K_{leaf}$  increase.**  
805 Fully expanded excised leaves of WT (Col0) plants, *aha2-4* mutant plants (Col0) and *aha2-*  
806 *4* plants complemented in their BSCs with *SCR:AHA2* were illuminated for 15 min  
807 immediately after dark, as in Fig.2. The columns are means ( $\pm$  SE) of the indicated number  
808 of biological repeats from three independent experiments. Different letters denote  
809 significantly different values (ANOVA, Post hoc Tukey's test,  $P < 0.05$ ). Note the marked  
810 restoration of  $K_{leaf}$  in the *aha2* mutant plants complemented solely in their BSCs.

811

812 **Figure 7. White light (WL) illumination for 30 minutes acidifies the xylem pH of WT**  
813 **plants and *SCR:PHOT1*-complemented mutants, but not in the *phot1-5* mutant.** The  
814 leaves of WT (Col-gl) plants, *phot1-5* (Col-gl) mutants and the *SCR:PHOT1*-  
815 complemented *phot1-5* mutant (as in Fig. 3) were illuminated by the growth room WL (150-  
816 200  $\mu\text{mol m}^{-2} \text{sec}^{-1}$ , Materials and Methods). The columns are means ( $\pm\text{SE}$ ) of the  
817 indicated number of biological repeats from three independent experiments. Different letters  
818 denote significantly different values (*Post hoc* Tukey's test,  $P < 0.05$ ).

819

820 **Figure 8: White light increases the BSCs membrane osmotic water permeability**  
821 **coefficient ( $P_f$ ).** **a.** A time course of swelling of bundle sheath protoplasts from *SCR:GFP*  
822 plants upon exposure to a hypotonic XPS<sup>db</sup> solution under the same illumination conditions  
823 (white light or darkness) as during the light treatment preceding the assay. The bath  
824 solution was buffered to pH 5.7. The arrow indicates onset of bath flush. **b.** Time course of  
825 the osmotic concentration change in the bath ( $C_{\text{out}}$ ) during the hypotonic challenge **c.** Mean  
826 ( $\pm\text{SE}$ ) initial  $P_f$  values of the indicated number of bundle sheath protoplasts under two light  
827 regimes from three independent experiments. Columns are means ( $\pm\text{SE}$ ) of 21-28  
828 biological repetitions, determined in five independent experiments. The asterisk indicates a  
829 significant difference (Student's two-tailed unpaired t-test,  $P < 0.05$ ).

830 **Figure 9. Proposed BSCs-autonomous BL signal transduction pathway.** **a.** An artist's  
831 rendering of a leaf radial water path, from xylem to mesophyll ( $K_{\text{leaf}}$ , blue hollow arrow)  
832 via the bundle sheath cells, BSCs, which tightly envelop the xylem. GC, a stomata guard  
833 cell; MC, mesophyll cell. **b.** Blue-light (BL) signalling pathway (blue arrowheads) in a  
834 bundle sheath cell, from BL perception by the phototropin receptors (PHOT), through an  
835 intermediate tyrphostin-sensitive tyrosine phosphorylation (TP), to the ultimate AHA2  
836 (orange circle) activation resulting in proton extrusion via the pump and xylem sap

837 acidification, presumably, at the expense of ATP breakdown to ADP with a transient  
838 phosphorylation (P) on the pump protein, as expected from a P-type H<sup>+</sup>-ATPase.

839

#### 840 SUPPLEMENTAL FIGURES AND TABLE

841 **Figure S1: PHOT receptors mutants do not show the effect of blue light on the  $g_s$ , E**  
842 **and  $\Psi_{\text{leaf}}$ .**

843 **Figure S2. *SCR:mir*-silencing of the PHOT receptors abolishes the effect of RL+BL on**  
844 **the  $g_s$ , E and  $\Psi_{\text{leaf}}$ .**

845 **Figure S3. BSCs-directed *PHOT1* complementation of the *phot1-5* mutant elevates**  
846  **$\Psi_{\text{leaf}}$  but not  $g_s$  or E.**

847 **Figure S4. Xylem-fed kinase inhibitor tyrphostin 9 does not affect BL-increased E but**  
848 **decreases BL-increased  $\Psi_{\text{leaf}}$ , while tyrphostin 9 sprayed on leaves acts oppositely.**

849 **Figure S5. Tyrphostin 9 perfused via the petiole does not affect the physiological**  
850 **parameters under RL-only illumination.**

851 **Figure S6. BSCs-directed *AHA2* complementation of the *aha2-4* mutant restores its**  
852 **BL-induced  $\Psi_{\text{leaf}}$  increase but not the BL increases of  $g_s$  or E.**

853 **Figure S7. The ‘long-illumination’  $g_s$  of intact leaves of whole plants does not differ**  
854 **among the different genotypes (WT, *phot* mutants and *SCR:PHOT1*).**

855 **Figure S8. *In-situ* calibration of di-8-ANEPPs fluorescence ratio (F-ratio,  $F_{438}/F_{531}$ )**  
856 **vs. the BSCs membrane potential ( $E_M$ ).**

857 **Figure S9. Leaf vein density does not depend on the expression of PHOT1 or PHOT2.**

858 **Table S1: List of primers used in this study**

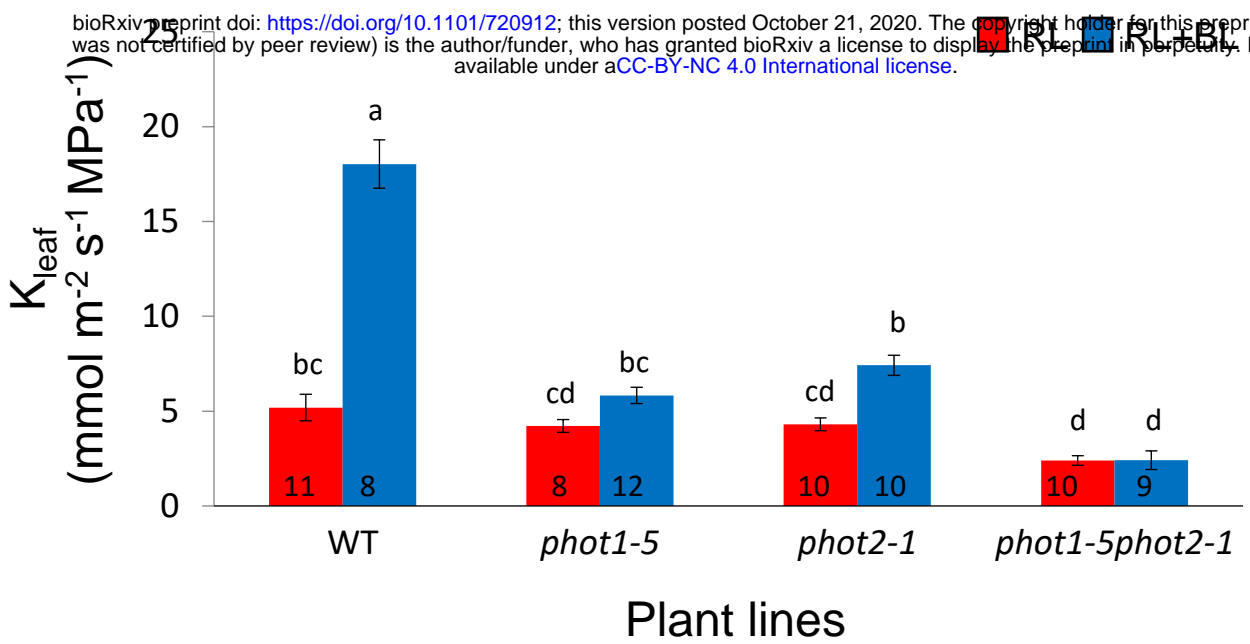

**Figure 1: The effect of blue light on  $K_{\text{leaf}}$  of PHOT receptors mutants.**  $K_{\text{leaf}}$  of fully expanded excised leaves of WT (Col-gl) and *PHOT* mutants (*phot1-5* (Col-gl), *phot2-1* (Col-gl) and a double mutant, *phot1-5 phot2-1* (Col-gl)) after illumination for 15 min immediately after dark, with RL ( $220 \mu\text{mol m}^{-2} \text{s}^{-1}$ ), or R+BL ( $220 \mu\text{mol m}^{-2} \text{s}^{-1}$ , consisting of 90 % RL and 10 % BL; Materials and methods). The columns are mean values ( $\pm$ SE) of the indicated number of biological repeats from three independent experiments. Different letters denote significantly different values (ANOVA, *Post hoc* Tukey's test,  $P < 0.05$ ). Note the reduced response to RL+BL in the mutant lines.

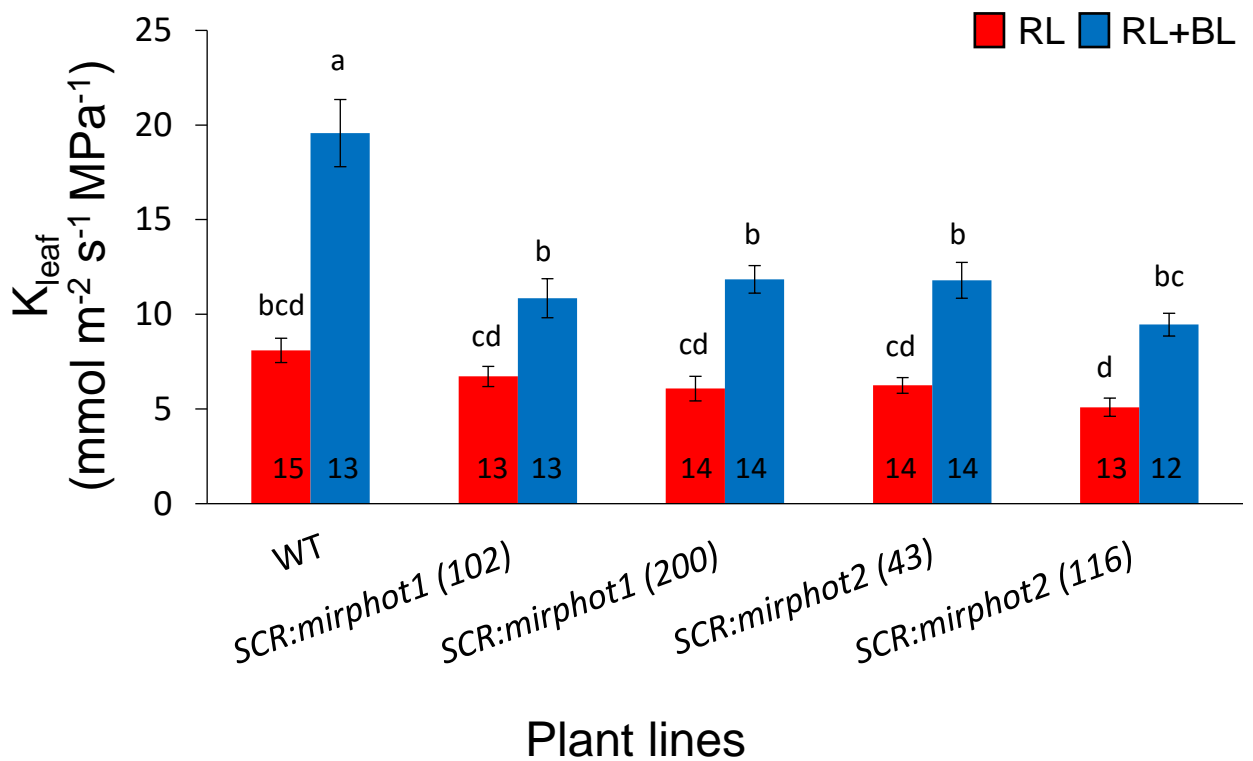

**Figure 2. The effect of RL+BL on the  $K_{\text{leaf}}$  of PHOT1- and PHOT2-silenced (SCR:mir) plants, generated in WT (Col; Materials and methods).  $K_{\text{leaf}}$  was determined in fully expanded leaves of WT and *SCR:mirphot1* and *SCR:mirphot2* plants treated with RL or RL+BL (as in Fig. 1; Materials and Methods) The columns are means ( $\pm$  SE) of the indicated number of biological repeats from three independent experiments. Different letters denote significantly different values (ANOVA, Post hoc Tukey's test,  $P < 0.05$ ).**

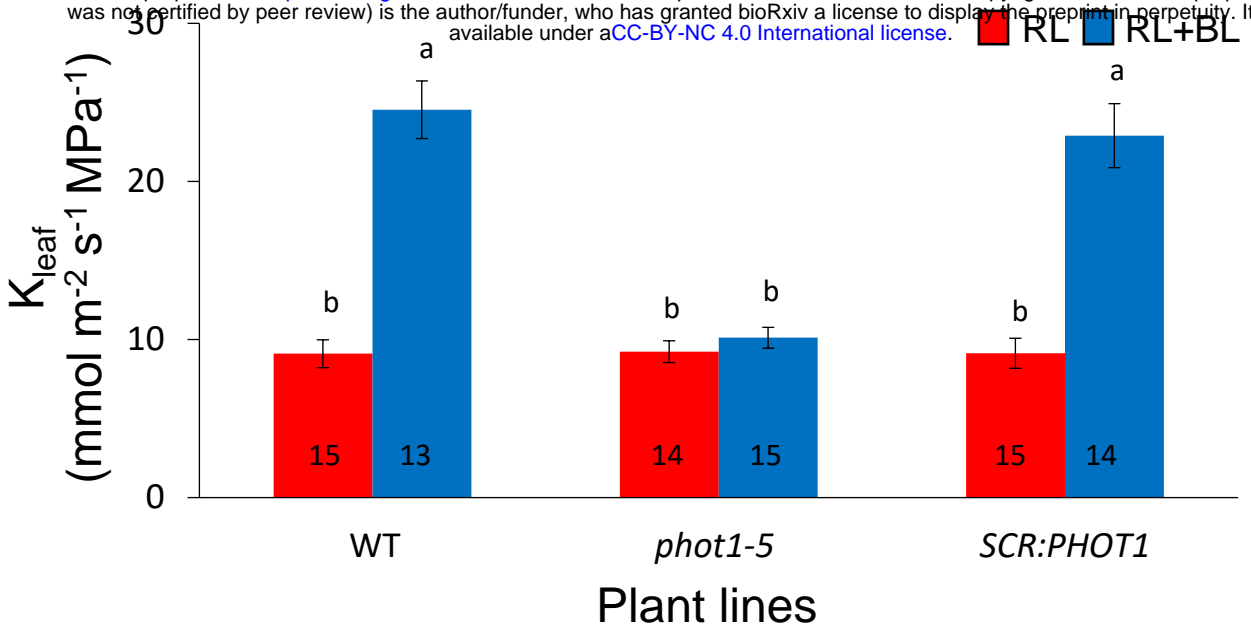

**Figure 3. BSCs-directed *PHOT1* complementation of the *phot1-5* mutant restores the normal  $K_{\text{leaf}}$ .** Fully expanded leaves of WT (Col-gl), *phot1-5* and *phot1-5* (Col-gl) plants complemented with *SCR:PHOT1* underwent illumination treatments as in Fig. 1. The columns are means ( $\pm$  SE) of the indicated number of biological repeats from three independent experiments. Different letters denote significantly different values (ANOVA, *Post hoc* Tukey's test,  $P < 0.05$ ).

■ RL    ■ RL+BL    ■ RL+BL+tyrphostin 9  
▨ RL    ▨ RL+BL    ▨ RL+BL+tyrphostin 9

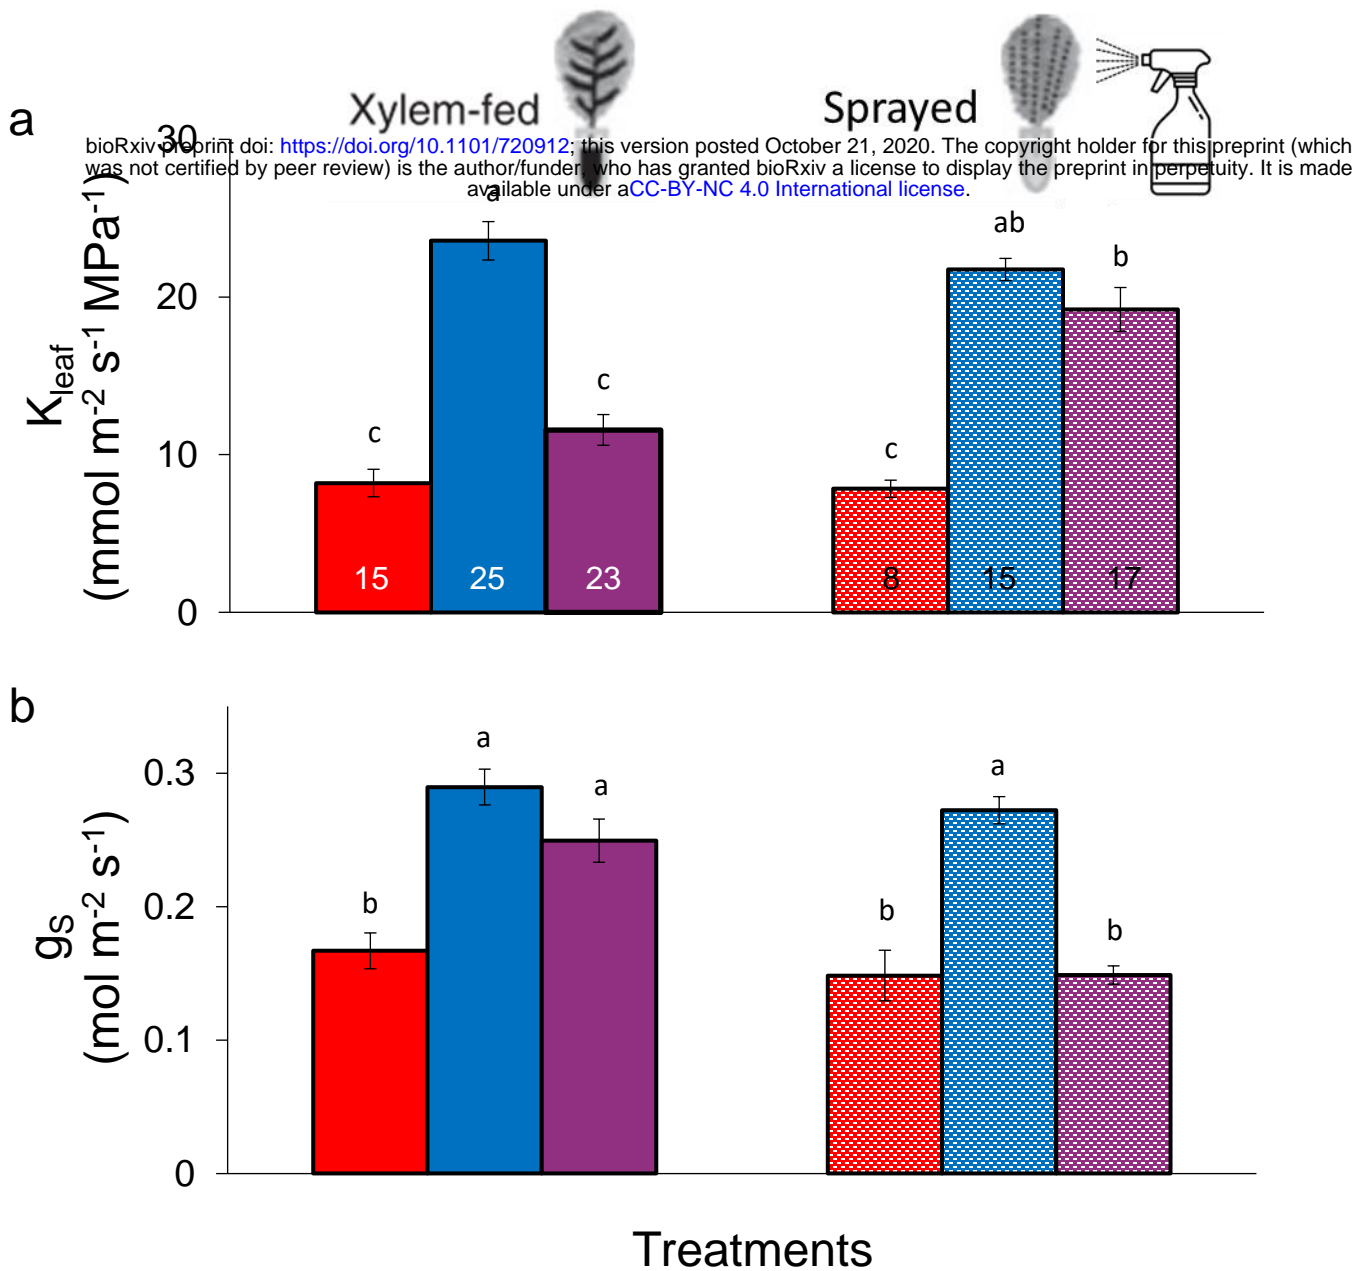

**Figure 4. Xylem-fed kinase inhibitor tyrphostin 9 abolished the blue-light-induced  $K_{\text{leaf}}$  increase and stomatal opening.** Fully expanded leaves of WT (Col-gi) were pre-incubated (petiole deep) in AXS without or with tyrphostin 9 (10  $\mu\text{M}$ ) or sprayed with AXS without or with tyrphostin 9 (10  $\mu\text{M}$ ), and kept overnight in dark boxes. Immediately after dark, leaves were illuminated for 15 min with RL (215  $\mu\text{mol m}^{-2} \text{ s}^{-1}$  red) or RL+BL (215  $\mu\text{mol m}^{-2} \text{ s}^{-1}$ , consisting of 90 % RL and 10 % BL). **a.**  $K_{\text{leaf}}$ . **b.** Stomatal conductance ( $g_s$ ). The columns are means ( $\pm$  SE) of the indicated number of biological repetitions, determined in three independent experimental days. Different letters denote significantly different values (ANOVA, Post hoc Tukey's test,  $P < 0.05$ ). Note that  $g_s$  was reduced when tyrphostin 9 was sprayed but not when fed via the petiole.

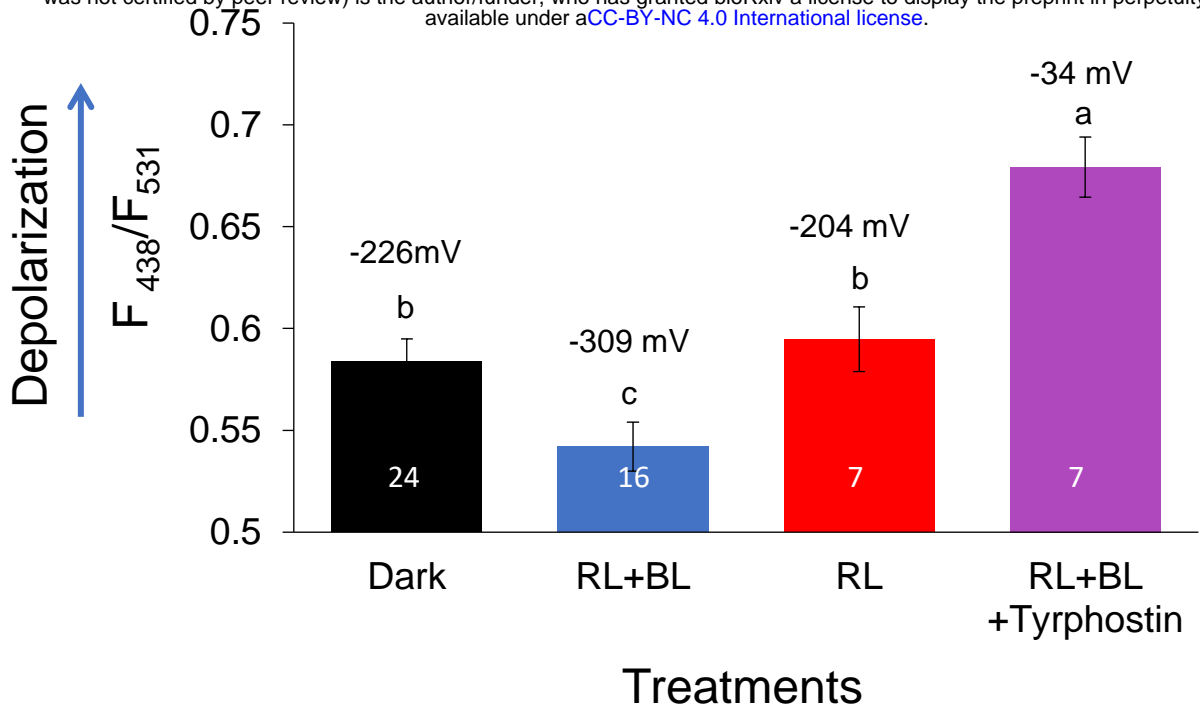

**Figure 5. - Blue light (BL) hyperpolarizes the BSCs relative to red light (RL) or Dark and tyrphostin 9 depolarizes them.** Membrane potential ( $E_M$ ) of BSC protoplasts, without or with petiole-fed tyrphostin 9 (10  $\mu$ M), determined using the dual-excitation, ratiometric fluorescent dye di-8-ANEPPS (Materials and Methods). After at least 10-20 min in the dark, the cells were immediately imaged (Dark), or illuminated for an additional 5-10 minutes either with RL (220  $\mu$ mol  $m^{-2} s^{-1}$ ) or with RL+BL (220  $\mu$ mol  $m^{-2} s^{-1}$ , including 10% BL; Materials and Methods), and then imaged. The columns are mean values of fluorescence ratio ( $F_{438}/F_{531}$ ) values ( $\pm$ SE; n as indicated) derived from analyses of the images captured at the indicated excitation wavelengths (Materials and Methods) in three independent experiments. Numbers above the columns are the mean values of BSCs  $E_M$ , based on a calibration curve of  $F_{438}/F_{531}$  vs.  $E_M$  obtained in separate experiments using patch clamp (Materials and Methods, Suppl. Fig. S8). Different letters denote significantly different values (ANOVA, Post hoc Tukey's test,  $P < 0.05$ ).



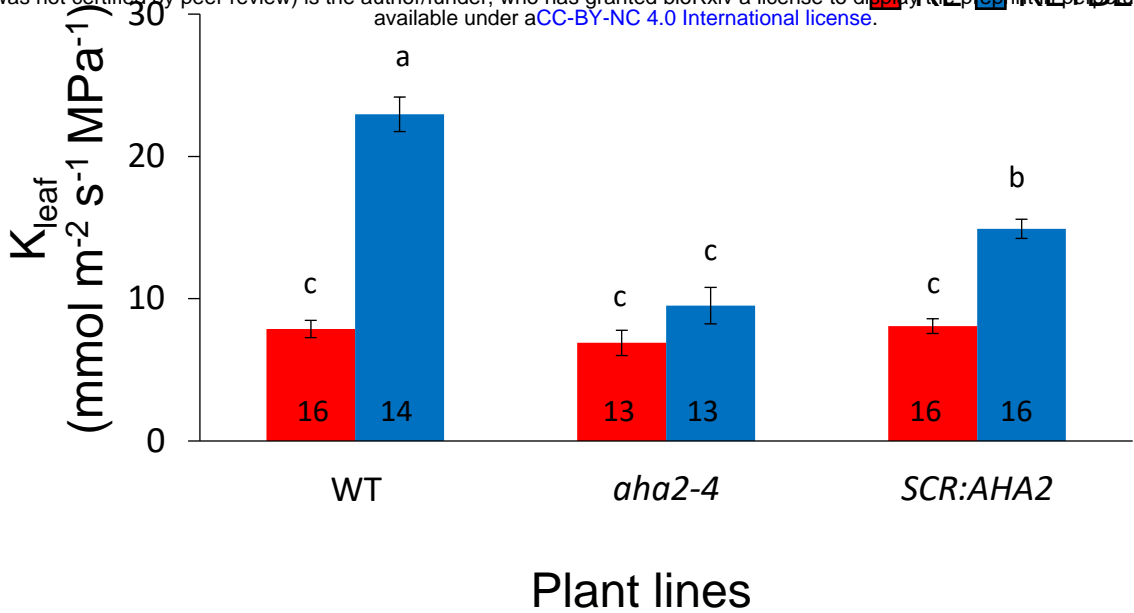

**Figure 6. The BSCs H<sup>+</sup>-ATPase, AHA2, mediates the blue-light-induced  $K_{leaf}$  increase.** Fully expanded excised leaves of WT (Col0) plants, *aha2-4* mutant plants (Col0) and *aha2-4* plants complemented in their BSCs with SCR:AHA2 were illuminated for 15 min immediately after dark, as in Fig.2. The columns are means ( $\pm$  SE) of the indicated number of biological repeats from three independent experiments. Different letters denote significantly different values (ANOVA, Post hoc Tukey's test,  $P < 0.05$ ). Note the marked restoration of  $K_{leaf}$  in the *aha2* mutant plants complemented solely in their BSCs.

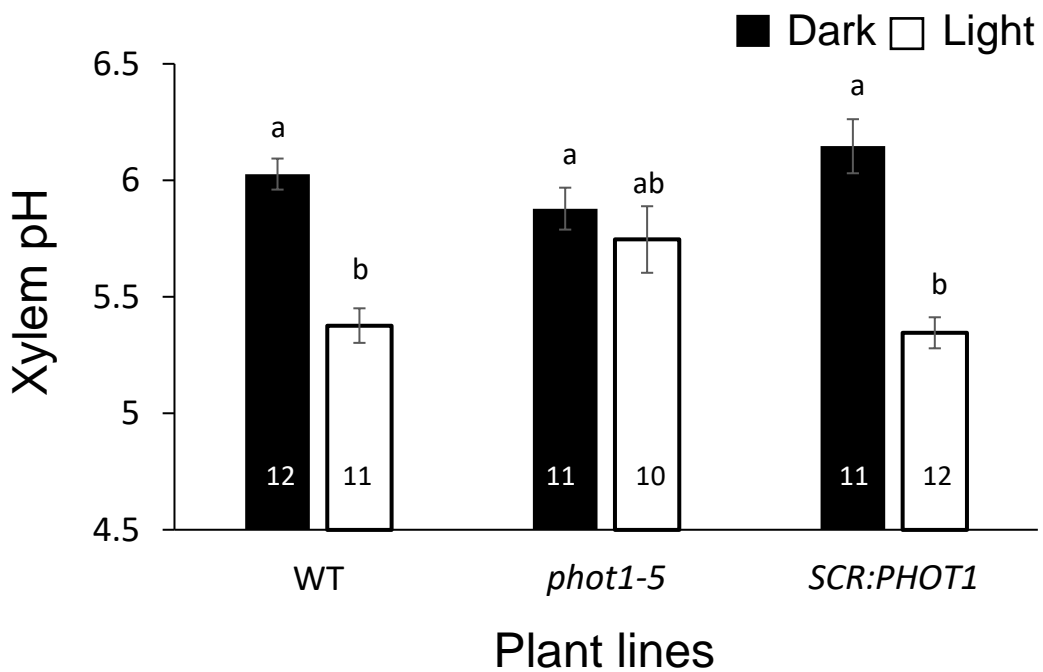

**Figure 7. White light (WL) illumination for 30 minutes acidifies the xylem pH of WT plants and *SCR:PHOT1*-complemented mutants, but not in the *phot1-5* mutant.** The leaves of WT (Col-gl) plants, *phot1-5* (Col-gl) mutants and the *SCR:PHOT1*-complemented *phot1-5* mutant (as in Fig. 3) were illuminated by the growth room WL (150-200  $\mu\text{mol m}^{-2} \text{sec}^{-1}$ , Materials and Methods). The columns are means ( $\pm$ SE) of the indicated number of biological repeats from three independent experiments. Different letters denote significantly different values (*Post hoc* Tukey's test,  $P < 0.05$ ).

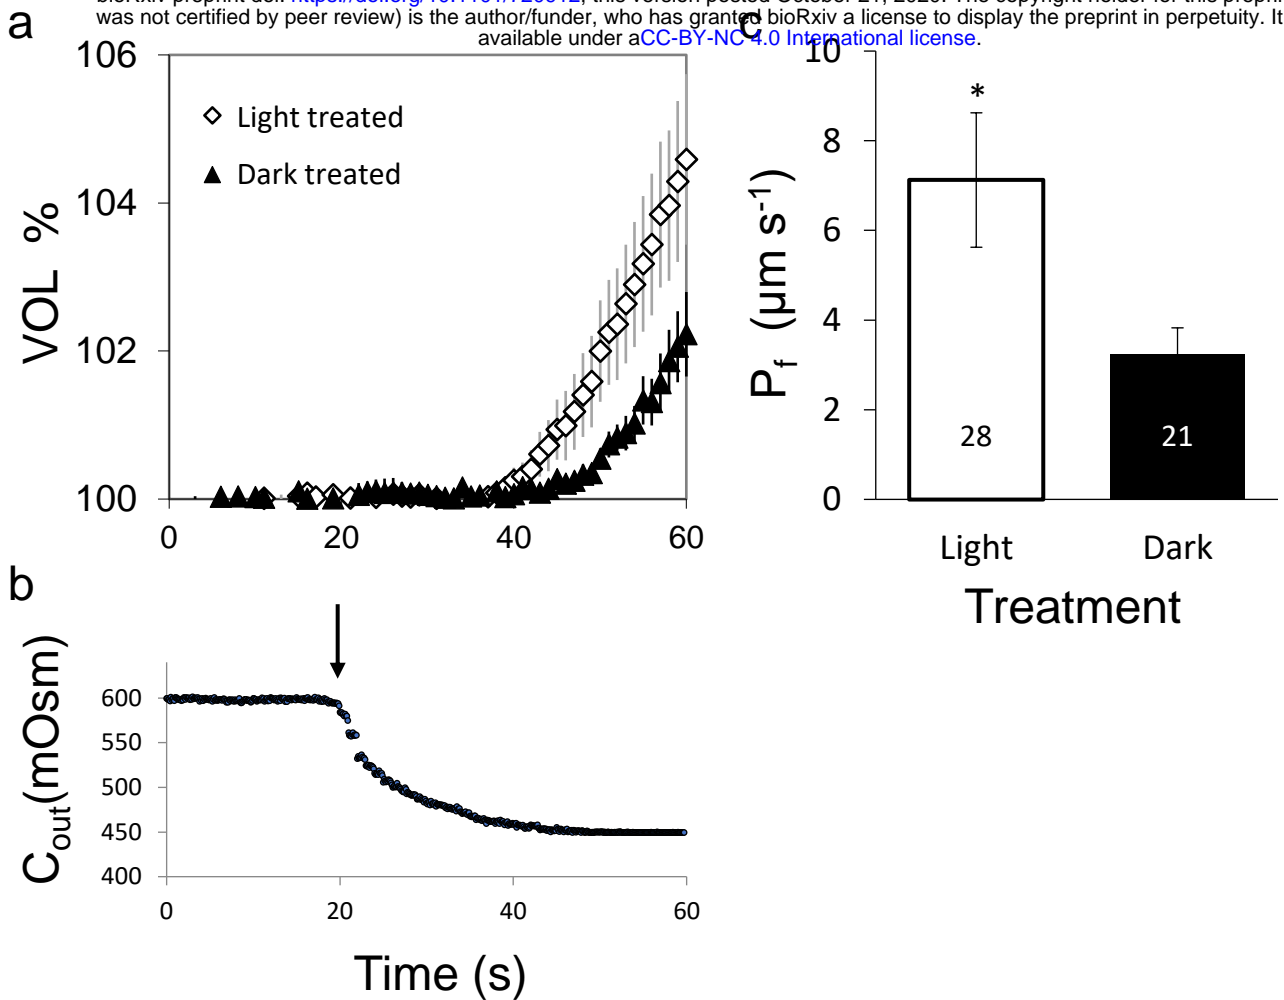

**Figure 8: White light increases the BSCs membrane osmotic water permeability coefficient ( $P_f$ ).** **a.** A time course of swelling of bundle sheath protoplasts from *SCR:GFP* plants upon exposure to a hypotonic XPS<sup>db</sup> solution under the same illumination conditions (white light or darkness) as during the light treatment preceding the assay. The bath solution was buffered to pH 5.7. The arrow indicates onset of bath flush. **b.** Time course of the osmotic concentration change in the bath ( $C_{out}$ ) during the hypotonic challenge **c.** Mean ( $\pm$ SE) initial  $P_f$  values of the indicated number of bundle sheath protoplasts under two light regimes from three independent experiments. Columns are means ( $\pm$  SE) of 21-28 biological repetitions, determined in five independent experiments. The asterisk indicates a significant difference (Student's two-tailed unpaired t-test,  $P < 0.05$ ).

a

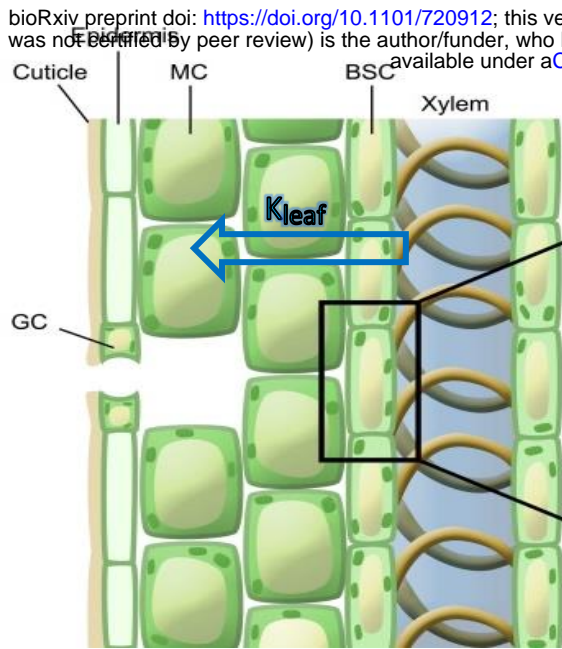

b

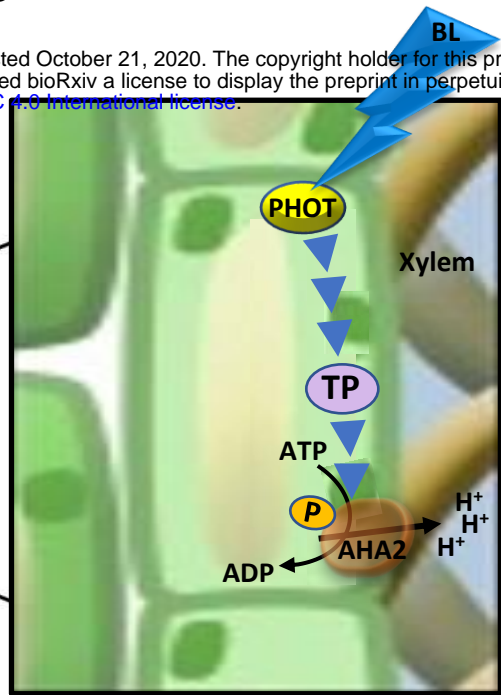

**Figure 9. Proposed BSCs-autonomous BL signal transduction pathway.**

**a.** An artist's rendering of a leaf radial water path, from xylem to mesophyll ( $K_{\text{leaf}}$ , blue hollow arrow) via the bundle sheath cells, BSCs, which tightly envelop the xylem. GC, a stomata guard cell; MC, mesophyll cell. **b.** Blue-light (BL) signalling pathway (blue arrowheads) in a bundle sheath cell, from BL perception by the phototropin receptors (PHOT), through an intermediate tyrphostin-sensitive tyrosine phosphorylation (TP), to the ultimate AHA2 (orange circle) activation resulting in proton extrusion via the pump and xylem sap acidification, presumably, at the expense of ATP breakdown to ADP with a transient phosphorylation (P) on the pump protein, as expected from a P-type  $\text{H}^+$ -ATPase.
