# Supplementary material for: Out of the blue: Phototropins of the leaf vascular bundle sheath mediate the regulation of leaf hydraulic conductance by blue light
Source: bioRxiv or medRxiv preprint supplement (doi:10.1101/720912), 2022-02-15
Supplement: Supplementary file [file media-1.pdf]

**Table S1: List of primers used in this study**

|                           |                          |                            |
|---------------------------|--------------------------|----------------------------|
| aha2-4 forward            | ATGTTTCATTGCAAAGGTGGTG   | AHA 2 Genotyping           |
| aha2-4 reverse            | CCCATTAGCTCGTGGTTATTG    | AHA 2 Genotyping           |
| Bb1.3 tDNA insert         | ATTTTGCCGATTTTCGGAAC     |                            |
| aha2-4 forward 2972       | ATGATTGCTTTCCTCATTGCA    | AHA2 Trans.<br>Genotyping  |
| 35S terminator<br>reverse | GCAGGTCACTGGATTTTGGT     |                            |
| B1F                       | GGGGACAAGTTTGTACAAAAAAGC | Gateway end for<br>cloning |
| B2R                       | GGGGACCACTTTGTACAAGAAAG  |                            |
| SCR-2341F                 | TTCTCCTCATCGGAGATCGT     | amiRNA::Phot<br>sequencing |
| miRNA_Seq_F               | GCTCGGACGCATATTACACA     |                            |
| miRNA_Seq_R               | CCAATTTGTCTACCGCATCA     |                            |
| Phot1kin_F                | CAGAGTGGGGATTGGTTTTGAAG  | to amplify PHOT1<br>cDNA   |
| Phot1kin_R                | GTTTGCTGATCTTCTAGCTCAGG  |                            |
| P2kinoF:                  | CGAGTGGAAAAGAGACACATGG   | to amplify PHOT2<br>cDNA   |
| P2kinoR                   | CTTGTCGGTAGAATTCACAAGCAC |                            |
